# Supplementary material for: Paralogous synthetic lethality underlies genetic dependencies of the cancer-mutated gene STAG2
Source: Life Sci Alliance. 2021 Aug 30;4(11):e202101083. doi: 10.26508/lsa.202101083 (PMC8408347; doi:10.26508/lsa.202101083)
Supplement: Supplementary file 4 [file LSA-2021-01083_TableS4.xlsx]

## Sheet: Sheet1
Table S4- Genetic interaction scores for the RPE1 STAG2 KO screen
GENE	residual	fdr
A1BG	0.265054	0.86107
A1CF	-0.289907	0.860383
A2ML1	0.21697	0.896218
A2M	0.889092	0.570037
A3GALT2	-0.662425	0.528076
A4GALT	-0.26214	0.866982
A4GNT	0.0327667	0.988498
AAAS	0.896451	0.372536
AACS	0.193609	0.908139
AADACL2	-0.0143057	0.996046
AADACL3	-0.0462619	0.981981
AADACL4	-0.170904	0.919665
AADAC	0.229688	0.879813
AADAT	0.346052	0.820532
AAED1	-0.537316	0.672228
AAGAB	0.162257	0.929504
AAK1	0.311705	0.845196
AAMDC	0.351532	0.787893
AAMP	0.0694278	0.970133
AANAT	0.169137	0.914833
AAR2	0.319357	0.815551
AARD	-0.661771	0.517794
AARS2	0.205851	0.908174
AARSD1	-0.0685703	0.988006
AARS	0.107502	0.951632
AASDHPPT	0.455747	0.750719
AASDH	0.241155	0.889692
AASS	0.13373	0.934226
AATF	0.148807	0.929192
AATK	-0.0335349	0.988223
ABAT	0.235963	0.885209
ABCA10	0.457451	0.772077
ABCA12	0.618903	0.562361
ABCA13	0.0945747	0.955948
ABCA1	0.0268363	0.990715
ABCA2	-0.307881	0.829026
ABCA3	-0.0257222	0.991135
ABCA4	0.370502	0.820681
ABCA5	-0.267398	0.860499
ABCA6	0.302639	0.857468
ABCA7	-0.798822	0.36105
ABCA8	-0.993059	0.265664
ABCA9	0.149505	0.930131
ABCB10	-0.27695	0.858568
ABCB11	-0.235379	0.883789
ABCB1	-0.106984	0.948711
ABCB4	-0.374353	0.795232
ABCB5	0.088783	0.95853
ABCB6	-0.246414	0.881251
ABCB7	-0.0817857	0.969013
ABCB8	0.26638	0.862069
ABCB9	0.603771	0.610316
ABCC10	-0.321682	0.846783
ABCC11	-0.341307	0.805763
ABCC12	0.509115	0.666407
ABCC1	0.495989	0.715218
ABCC2	-0.100621	0.953183
ABCC3	0.0408294	0.984418
ABCC4	0.306264	0.837937
ABCC5	0.24202	0.87543
ABCC6	0.622991	0.564369
ABCC8	0.56597	0.627248
ABCC9	-0.0855759	0.961346
ABCD1	-0.207388	0.908174
ABCD2	-0.225784	0.881641
ABCD3	0.504684	0.69554
ABCD4	-0.136481	0.933997
ABCE1	0.515428	0.684213
ABCF1	0.248211	0.879656
ABCF2	0.360416	0.815136
ABCF3	-0.3647	0.779847
ABCG1	-0.582383	0.590544
ABCG2	0.178538	0.913418
ABCG4	0.0571691	0.981872
ABCG5	-0.218224	0.90287
ABCG8	-0.240117	0.877425
ABHD10	-0.187739	0.919992
ABHD11	-0.44495	0.803218
ABHD12B	-0.24743	0.879813
ABHD12	-0.0206474	0.993422
ABHD13	-0.264454	0.866513
ABHD14A	0.355946	0.800655
ABHD14B	0.466541	0.741305
ABHD15	-0.164714	0.927328
ABHD16A	0.129326	0.938851
ABHD16B	-0.048677	0.981275
ABHD17A	0.580718	0.688983
ABHD17B	0.0726217	0.969227
ABHD17C	0.302026	0.840604
ABHD1	0.34665	0.791411
ABHD2	-0.00538003	0.997841
ABHD3	-0.107782	0.957465
ABHD4	-0.170072	0.919992
ABHD5	-0.129955	0.94656
ABHD6	0.082491	0.96533
ABHD8	0.422915	0.734162
ABI1	-0.263625	0.871845
ABI2	-0.138988	0.932654
ABI3BP	0.270707	0.865907
ABI3	-0.259041	0.869638
ABL1	0.438256	0.715218
ABL2	0.2265	0.895769
ABLIM1	0.0103306	0.99635
ABLIM2	-0.143839	0.934226
ABLIM3	0.367722	0.805207
ABRACL	0.169699	0.923895
ABRA	0.398	0.748256
ABR	-0.390586	0.759811
ABT1	0.696883	0.532356
ABTB1	-0.378587	0.761088
ABTB2	0.258383	0.879813
AC007040.11	0.161247	0.933392
AC007431.1	-0.00412908	0.998127
AC009892.10	0.409559	0.904185
AC016722.1	0.466393	0.71689
AC016757.3	0.0131148	0.996148
AC018755.1	-0.14392	0.933702
AC079612.1	-0.00528382	0.997887
AC091801.1	-0.287231	0.879813
AC093802.1	0.772937	0.41585
AC106876.2	0.159123	0.925245
ACAA1	-0.613801	0.560287
ACAA2	-0.142998	0.933819
ACACA	0.27498	0.851461
ACACB	0.569222	0.612306
ACAD10	0.102734	0.950161
ACAD11	-0.128415	0.938285
ACAD8	0.53454	0.634632
ACAD9	0.627468	0.598375
ACADL	0.00749708	0.997162
ACADM	-0.561965	0.603773
ACADSB	-0.7406	0.637803
ACADS	0.133108	0.94322
ACADVL	-0.360648	0.820532
ACAN	-0.521465	0.666407
ACAP1	-0.12125	0.948072
ACAP2	-0.0333168	0.988179
ACAP3	0.181905	0.910979
ACAT1	0.443787	0.715218
ACAT2	-0.554074	0.633332
ACBD3	-0.439219	0.754237
ACBD4	0.349809	0.793318
ACBD5	0.484605	0.686502
ACBD6	0.292888	0.869669
ACBD7	0.0621474	0.976952
ACCSL	0.321556	0.851077
ACCS	0.395799	0.754251
ACD	-0.533416	0.686502
ACE2	0.37642	0.764359
ACER1	-0.0620733	0.974512
ACER2	0.115605	0.947707
ACER3	0.323043	0.838815
ACE	0.0403562	0.984453
ACHE	0.152779	0.931734
ACIN1	-0.148501	0.935327
ACKR2	0.0305665	0.98906
ACKR3	0.52981	0.639487
ACKR4	-0.332842	0.850456
ACLY	0.89485	0.27751
ACMSD	0.00881614	0.996378
ACN9	0.140759	0.932654
ACO1	0.121973	0.94093
ACO2	0.153522	0.929192
ACOT11	0.196124	0.90287
ACOT12	-0.15871	0.938285
ACOT13	0.494276	0.679065
ACOT2	0.0484229	0.981981
ACOT4	-0.134931	0.934226
ACOT6	0.413743	0.766677
ACOT7	-0.0703439	0.970836
ACOT8	0.411775	0.765096
ACOT9	-0.0730557	0.969013
ACOX1	-0.097066	0.96533
ACOX2	-0.515214	0.683915
ACOX3	0.000680768	0.999761
ACOXL	0.255511	0.864808
ACP1	0.161121	0.919992
ACP2	0.0541307	0.979841
ACP5	0.391046	0.784502
ACP6	0.0613322	0.97547
ACPL2	-0.587623	0.603773
ACPP	-0.338155	0.850456
ACPT	-0.422427	0.803522
ACRBP	0.33647	0.802114
ACRC	0.00672978	0.997935
ACRV1	0.097999	0.953183
ACR	-0.106748	0.950161
ACSBG1	0.428194	0.724499
ACSBG2	0.0845325	0.962049
ACSF2	-0.392193	0.759912
ACSF3	-0.279061	0.851077
ACSL1	0.891331	0.340107
ACSL3	0.831219	0.406027
ACSL4	-0.0586759	0.979523
ACSL5	-0.159996	0.922545
ACSL6	0.133614	0.937385
ACSM1	0.331049	0.808662
ACSM2A	1.06761	0.433575
ACSM2B	-0.254776	0.871249
ACSM3	-0.22102	0.90287
ACSM4	0.798331	0.450254
ACSM5	0.0423575	0.985708
ACSS1	-0.151615	0.929905
ACSS2	0.264717	0.861773
ACSS3	0.196335	0.917621
ACTA1	0.16511	0.93351
ACTA2	-0.429034	0.735593
ACTBL2	0.378551	0.767329
ACTB	1.05133	0.426091
ACTC1	0.281364	0.860872
ACTG1	0.230967	0.88913
ACTG2	0.176827	0.922545
ACTL10	0.0401838	0.984418
ACTL6A	-0.551117	0.73648
ACTL6B	-0.111207	0.947515
ACTL7A	-0.465638	0.738788
ACTL7B	-0.263778	0.865681
ACTL8	0.195278	0.91873
ACTL9	0.104254	0.952658
ACTN1	-0.305133	0.83894
ACTN2	-0.669563	0.532356
ACTN4	-0.11666	0.947153
ACTR10	0.129151	0.938401
ACTR1A	-0.184974	0.907393
ACTR1B	-0.198479	0.922116
ACTR2	0.0412617	0.986474
ACTR3B	0.121417	0.948381
ACTR3C	-0.0909581	0.976466
ACTR3	-0.0562301	0.979621
ACTR5	0.177923	0.911149
ACTR6	-0.847537	0.348219
ACTR8	-0.227923	0.896812
ACTRT1	-0.445465	0.718078
ACTRT2	-0.292847	0.851269
ACTRT3	0.287422	0.850456
ACVR1B	1.52281	0.0773934
ACVR1C	0.806587	0.406027
ACVR1	-0.0531803	0.981585
ACVR2A	0.776907	0.428826
ACVR2B	0.270614	0.863552
ACVRL1	0.491103	0.709451
ACY1	-0.165999	0.928249
ACY3	-0.083846	0.96402
ACYP1	0.447605	0.732529
ACYP2	0.356233	0.793318
ADAD1	0.0841043	0.962049
ADAD2	0.481228	0.709129
ADAL	0.899798	0.276495
ADAM10	0.0609649	0.974859
ADAM11	0.352163	0.788167
ADAM12	-0.486136	0.706156
ADAM15	-0.0822509	0.964686
ADAM17	-0.0207269	0.995142
ADAM18	-0.22792	0.885194
ADAM19	-0.268376	0.881641
ADAM20	-0.24564	0.877185
ADAM21	-0.149766	0.932654
ADAM22	0.29188	0.84776
ADAM23	-0.319658	0.820601
ADAM28	-0.254521	0.873951
ADAM29	0.0510635	0.980401
ADAM2	0.20652	0.913418
ADAM30	0.0622491	0.976466
ADAM32	-0.0370832	0.986992
ADAM33	0.899636	0.279963
ADAM7	0.292478	0.844019
ADAM8	0.358074	0.783432
ADAM9	0.620474	0.595774
ADAMDEC1	-0.0672898	0.974557
ADAMTS10	-0.319162	0.815551
ADAMTS12	-0.184351	0.931734
ADAMTS13	-0.133145	0.934226
ADAMTS14	-0.422542	0.747657
ADAMTS15	0.31289	0.835569
ADAMTS16	0.359024	0.776724
ADAMTS17	-0.520112	0.649575
ADAMTS18	0.263839	0.881641
ADAMTS19	0.561407	0.627248
ADAMTS1	-0.25614	0.865681
ADAMTS20	0.339708	0.838701
ADAMTS2	-0.111432	0.953081
ADAMTS3	-0.121376	0.944979
ADAMTS4	0.155882	0.924367
ADAMTS5	-0.0704508	0.97002
ADAMTS7	0.173544	0.914833
ADAMTS8	-0.15041	0.930123
ADAMTS9	-0.758653	0.439251
ADAMTSL1	0.0141269	0.996148
ADAMTSL2	0.103529	0.951298
ADAMTSL3	-0.140128	0.934226
ADAMTSL4-AS1	-0.306997	0.84648
ADAMTSL4	-0.54972	0.644709
ADAMTSL5	0.00860301	0.997257
ADAP1	0.229388	0.885209
ADAP2	0.250783	0.867087
ADARB1	0.159371	0.925245
ADARB2	-0.131872	0.935597
ADAR	-0.153653	0.928831
ADAT1	-0.242091	0.892506
ADAT2	0.34419	0.844241
ADAT3	0.133607	0.942074
ADA	-0.305733	0.834568
ADCK1	-0.39372	0.761088
ADCK2	-0.352801	0.786783
ADCK3	-0.616434	0.564369
ADCK4	0.407349	0.756574
ADCK5	-0.303674	0.863552
ADCY10	-0.105307	0.95801
ADCY1	-0.590183	0.596971
ADCY2	0.479265	0.695165
ADCY3	0.0303902	0.989817
ADCY4	0.110143	0.963637
ADCY5	-0.344901	0.789752
ADCY6	1.39532	0.0570392
ADCY7	-0.0584272	0.976123
ADCY8	-0.359358	0.851269
ADCY9	-0.112489	0.955948
ADCYAP1R1	0.858157	0.478298
ADCYAP1	-0.0335652	0.9878
ADC	-0.0719674	0.97485
ADD1	0.501498	0.682496
ADD2	-0.275064	0.8888
ADD3	-0.195325	0.90287
ADGB	0.533028	0.6361
ADH1A	0.0103201	0.99635
ADH1B	0.100142	0.951298
ADH4	0.285931	0.863552
ADH5	0.149503	0.92926
ADH6	-0.358328	0.804289
ADH7	0.361848	0.79631
ADHFE1	0.0844912	0.962049
ADI1	-0.477865	0.74695
ADIG	0.477289	0.748256
ADIPOQ	0.220611	0.896795
ADIPOR1	0.0976846	0.955998
ADIPOR2	-0.0639834	0.975327
ADIRF	0.1482	0.931957
ADK	-0.546298	0.671236
ADM2	-0.259457	0.879813
ADM5	0.241079	0.889692
ADM	0.0439861	0.985056
ADNP2	-0.714809	0.57882
ADNP	-0.355768	0.855777
ADORA1	-0.249901	0.869669
ADORA2A	0.200905	0.903167
ADORA2B	-0.0218473	0.994957
ADORA3	-0.622726	0.57882
ADO	-0.367234	0.787561
ADPGK	-0.134459	0.934226
ADPRHL1	0.332178	0.82508
ADPRHL2	0.114777	0.944949
ADPRH	-0.493591	0.715218
ADPRM	-0.1454	0.931005
ADRA1A	-0.0611859	0.974963
ADRA1B	-0.11354	0.947519
ADRA1D	-0.15078	0.944252
ADRA2A	-0.00762134	0.996803
ADRA2B	-0.170806	0.922545
ADRA2C	-0.472305	0.69486
ADRB1	-0.805715	0.355574
ADRB2	0.150293	0.932654
ADRB3	-0.225693	0.881641
ADRBK1	-0.000242311	0.999921
ADRBK2	-0.0320261	0.98805
ADRM1	0.2496	0.879365
ADSL	0.19188	0.907393
ADSSL1	-0.29688	0.842156
ADSS	-0.555569	0.649299
ADTRP	0.192461	0.907393
AEBP1	0.747359	0.426091
AEBP2	-0.0921915	0.95801
AEN	-0.55051	0.644709
AES	0.0349675	0.988179
AFAP1L1	-0.0183112	0.995884
AFAP1L2	-0.270408	0.860333
AFAP1	0.491487	0.709129
AFF1	-0.265683	0.860383
AFF2	-0.220381	0.890055
AFF3	-0.221506	0.895038
AFF4	0.328379	0.838701
AFG3L2	0.513735	0.766677
AFMID	0.377535	0.761088
AFM	-0.187042	0.907841
AFP	0.0380262	0.986185
AFTPH	-0.0131925	0.996148
AGAP1	-0.208936	0.895354
AGAP2	0.663193	0.598375
AGAP3	0.470864	0.731711
AGA	0.0810728	0.970683
AGBL1	0.131518	0.935597
AGBL2	-0.0189082	0.995173
AGBL3	-0.0556891	0.979523
AGBL4	-0.206026	0.90287
AGBL5	-0.254426	0.876703
AGER	-0.33071	0.842156
AGFG1	-0.348746	0.793027
AGFG2	-0.483821	0.709129
AGGF1	-0.134783	0.934226
AGK	0.0757502	0.967721
AGL	0.429327	0.739376
AGMAT	0.382474	0.768492
AGMO	-0.0112927	0.99635
AGO1	0.198595	0.90287
AGO2	-0.242692	0.878644
AGO3	-0.213414	0.901279
AGO4	-0.161462	0.919992
AGPAT1	0.195232	0.907393
AGPAT2	0.345344	0.815735
AGPAT3	-0.439038	0.757435
AGPAT4	-0.42094	0.751012
AGPAT5	-0.523688	0.644709
AGPAT6	-0.198895	0.907393
AGPAT9	-0.351533	0.79224
AGPS	0.339267	0.803218
AGR2	0.678767	0.518271
AGR3	-0.0253609	0.992337
AGRN	0.349824	0.830678
AGRP	-0.0774136	0.974009
AGTPBP1	0.693303	0.469569
AGTR1	-0.0216457	0.994435
AGTR2	-0.179534	0.928454
AGTRAP	-0.085218	0.962583
AGT	-0.354926	0.792848
AGXT2	0.16823	0.915034
AGXT	-0.0301922	0.989863
AHCTF1	0.179101	0.919992
AHCYL1	0.161443	0.925488
AHCYL2	0.409832	0.739982
AHCY	0.576611	0.638758
AHDC1	-0.331269	0.81028
AHI1	-0.0587732	0.980714
AHNAK2	-0.363603	0.869669
AHNAK	-0.587519	0.603773
AHRR	0.30087	0.842156
AHR	1.37664	0.0663214
AHSA1	0.497801	0.664047
AHSA2	-0.197245	0.90981
AHSG	0.290655	0.879365
AHSP	-0.062769	0.974649
AICDA	0.0935548	0.960556
AIDA	0.581641	0.598375
AIF1L	-0.0791332	0.96533
AIF1	0.316451	0.831947
AIFM1	-0.127888	0.937385
AIFM2	0.224469	0.889692
AIFM3	-0.222489	0.889692
AIG1	-0.381988	0.809164
AIM1L	-0.177976	0.919992
AIM1	-0.0738853	0.967845
AIM2	0.0497122	0.980834
AIMP1	0.344654	0.815136
AIMP2	0.238155	0.884913
AIPL1	-0.0562359	0.979564
AIP	1.45422	0.0242126
AIRE	-0.0958104	0.96522
AJAP1	0.347266	0.815551
AJUBA	-0.509571	0.650017
AK1	0.663489	0.570864
AK2	0.583233	0.633332
AK3	-0.00469841	0.997887
AK4	0.0553707	0.978397
AK5	0.165808	0.919858
AK7	-0.47825	0.706079
AK8	-0.0917442	0.961033
AK9	-0.3697	0.785471
AKAP10	0.108308	0.950161
AKAP11	0.139852	0.934226
AKAP12	0.0564376	0.979445
AKAP13	0.150982	0.93351
AKAP14	-0.133605	0.934226
AKAP1	-0.0232516	0.991779
AKAP2	-0.463581	0.820601
AKAP3	0.287791	0.879365
AKAP4	0.0196559	0.995067
AKAP5	-0.0361174	0.986474
AKAP6	0.0407867	0.989208
AKAP7	0.0633658	0.978057
AKAP8L	-0.408912	0.746192
AKAP8	-0.0528581	0.980266
AKAP9	0.0421177	0.983399
AKIP1	-0.0511466	0.982068
AKIRIN1	-0.512667	0.697534
AKIRIN2	0.307153	0.853766
AKNAD1	0.184401	0.919992
AKNA	0.285055	0.857468
AKR1A1	-0.29935	0.851077
AKR1B10	-0.338443	0.848798
AKR1B15	-0.00535353	0.998127
AKR1B1	-0.278757	0.858353
AKR1C2	-0.603727	0.848798
AKR1C3	-0.049948	0.981981
AKR1C4	-0.0424029	0.990238
AKR1D1	0.100431	0.953183
AKR1E2	0.0419637	0.986426
AKR7A2	0.315221	0.827313
AKR7A3	-0.155079	0.929799
AKT1S1	-0.115479	0.948711
AKT1	-0.171349	0.919992
AKT2	-0.142988	0.932654
AKT3	0.217364	0.889692
AKTIP	0.129893	0.944949
ALAD	0.373407	0.771831
ALAS1	-0.0311778	0.988674
ALAS2	-0.0367791	0.987711
ALB	0.50477	0.714403
ALCAM	-0.313814	0.850456
ALDH16A1	-0.570854	0.672228
ALDH18A1	-0.868783	0.34517
ALDH1A1	-0.110267	0.94761
ALDH1A2	0.189278	0.910979
ALDH1A3	0.0897592	0.958291
ALDH1B1	0.0620412	0.975256
ALDH1L1	-0.163171	0.929504
ALDH1L2	-0.012876	0.996148
ALDH2	0.237403	0.907393
ALDH3A1	-0.297748	0.838982
ALDH3A2	-0.432048	0.732839
ALDH3B2	0.255482	0.8888
ALDH4A1	0.177817	0.915421
ALDH5A1	-0.0640772	0.97485
ALDH6A1	0.0370429	0.987978
ALDH7A1	-0.224485	0.908084
ALDH8A1	0.141201	0.935327
ALDH9A1	-0.238823	0.89162
ALDOA	-0.191752	0.90424
ALDOB	0.154287	0.934226
ALDOC	0.217439	0.89407
ALG10B	1.39954	0.51301
ALG11	-0.273111	0.864423
ALG12	0.512961	0.736655
ALG13	-0.413934	0.739376
ALG14	-0.145638	0.931734
ALG1	0.29594	0.851987
ALG2	-0.191346	0.90667
ALG3	0.804425	0.487758
ALG5	-0.0583192	0.981872
ALG6	-0.444619	0.719469
ALG8	0.398808	0.812456
ALG9	0.756453	0.406027
ALKBH1	0.465361	0.749054
ALKBH2	0.304172	0.858525
ALKBH3	0.55297	0.608978
ALKBH4	0.458604	0.715218
ALKBH5	-0.405367	0.765162
ALKBH6	-0.340177	0.798729
ALKBH7	0.223262	0.888083
ALKBH8	-0.402385	0.769261
ALK	-0.262319	0.871845
ALLC	0.279168	0.858568
ALMS1	-0.147814	0.932654
ALOX12B	0.401273	0.749738
ALOX12	0.306169	0.850456
ALOX15B	0.0238339	0.993737
ALOX15	0.067996	0.972752
ALOX5AP	0.570466	0.592467
ALOX5	-0.463922	0.70304
ALOXE3	0.18014	0.911768
ALPI	-0.45748	0.712837
ALPK1	0.0966868	0.960659
ALPK2	0.356968	0.794756
ALPK3	0.019888	0.993532
ALPL	0.160403	0.922352
ALPPL2	-0.217904	0.929905
ALPP	0.533248	0.775376
ALS2CL	-0.0963074	0.953486
ALS2CR11	-0.276592	0.851269
ALS2CR12	-0.0962982	0.95801
ALS2	0.560783	0.63199
ALX1	0.489453	0.694662
ALX3	0.134753	0.944252
ALX4	0.290828	0.852134
ALYREF	-0.160531	0.932654
AMACR	-0.251925	0.892466
AMBN	0.126335	0.938255
AMBP	-0.530804	0.644709
AMBRA1	0.839613	0.428826
AMD1	-0.372927	0.763244
AMDHD1	0.284032	0.859596
AMDHD2	0.107483	0.959775
AMELX	-0.0883857	0.960659
AMELY	0.426827	0.732839
AMER1	0.143984	0.934226
AMER2	0.0015633	0.999419
AMER3	0.248764	0.869638
AMFR	0.382433	0.763876
AMHR2	0.242783	0.871845
AMH	0.439406	0.761088
AMICA1	-0.0605532	0.975236
AMIGO1	-0.434834	0.729544
AMIGO2	-0.0958728	0.957819
AMMECR1L	0.0663968	0.972219
AMMECR1	-0.0179541	0.995067
AMN1	0.817097	0.426091
AMN	-0.211981	0.90287
AMOTL1	0.015009	0.995884
AMOTL2	-1.16933	0.197909
AMOT	-0.205335	0.898963
AMPD1	-0.269253	0.866513
AMPD2	-0.0439599	0.983399
AMPD3	0.139194	0.932654
AMPH	-0.0536932	0.979523
AMTN	-0.100754	0.95801
AMT	-0.331278	0.811898
AMZ1	0.185528	0.910979
AMZ2	-0.354621	0.815551
ANAPC10	-0.802234	0.370215
ANAPC11	-0.160025	0.922021
ANAPC13	0.369548	0.789933
ANAPC15	-0.123075	0.94746
ANAPC16	-0.362107	0.816459
ANAPC1	0.335119	0.829708
ANAPC2	-0.132548	0.946121
ANAPC4	0.163153	0.931957
ANAPC5	0.639557	0.52607
ANAPC7	0.0404771	0.987272
ANGEL1	0.135234	0.935327
ANGEL2	0.447002	0.729499
ANGPT1	0.137749	0.948711
ANGPT2	0.328006	0.842156
ANGPT4	0.269371	0.866569
ANGPTL1	0.110213	0.96531
ANGPTL2	0.0179169	0.995142
ANGPTL3	0.133047	0.934226
ANGPTL4	0.0707672	0.970836
ANGPTL5	0.172083	0.914833
ANGPTL6	-0.294072	0.858353
ANGPTL7	0.318138	0.835654
ANG	0.302815	0.84041
ANHX	0.257786	0.867087
ANK1	-0.293872	0.869669
ANK2	-0.127685	0.942237
ANK3	-0.568667	0.598375
ANKAR	-0.382275	0.805763
ANKDD1A	-0.216581	0.896218
ANKDD1B	0.16909	0.932654
ANKEF1	0.273275	0.861773
ANKFN1	-0.378205	0.794045
ANKFY1	0.0842934	0.963082
ANKHD1-EIF4EBP3	0.42803	0.760753
ANKHD1	0.229899	0.947852
ANKH	0.508434	0.718707
ANKIB1	0.0507167	0.981981
ANKK1	0.0765978	0.972219
ANKLE1	-0.0889247	0.959775
ANKLE2	0.30791	0.865793
ANKMY1	0.00945119	0.996378
ANKMY2	0.463975	0.736655
ANKRA2	0.466777	0.724069
ANKRD10	0.234992	0.879813
ANKRD11	0.0955868	0.96123
ANKRD12	-0.0887241	0.963082
ANKRD13A	0.920646	0.278099
ANKRD13B	0.35663	0.794756
ANKRD13C	-0.131813	0.934226
ANKRD13D	0.0496186	0.982194
ANKRD16	-0.0223622	0.993422
ANKRD17	-0.0930327	0.955998
ANKRD18A	-0.0956096	0.982194
ANKRD18B	-0.292097	0.932704
ANKRD1	0.0602055	0.976952
ANKRD22	-0.245272	0.87562
ANKRD23	-0.0238576	0.991494
ANKRD24	0.349896	0.81219
ANKRD26	-0.0677961	0.972542
ANKRD27	-0.287395	0.848228
ANKRD28	0.401523	0.758289
ANKRD29	0.220258	0.908084
ANKRD2	-0.122999	0.941538
ANKRD30A	-0.59312	0.745932
ANKRD30BL	-0.141902	0.971149
ANKRD30B	-0.810027	0.36105
ANKRD31	0.423154	0.745342
ANKRD32	0.369153	0.785249
ANKRD33B	-0.498405	0.714334
ANKRD33	-0.383555	0.760753
ANKRD34A	-0.145582	0.944535
ANKRD34B	0.457887	0.706079
ANKRD34C	-0.229731	0.907393
ANKRD35	-0.736457	0.426091
ANKRD36C	-0.139375	0.934226
ANKRD36	-0.0306851	0.993422
ANKRD37	-0.162601	0.930123
ANKRD39	0.877662	0.342807
ANKRD40	0.00168417	0.999419
ANKRD42	-0.17437	0.915408
ANKRD44	-0.473879	0.692321
ANKRD45	-0.194994	0.903071
ANKRD46	-0.254063	0.866513
ANKRD49	-0.364695	0.782816
ANKRD50	-0.0721918	0.974963
ANKRD52	-0.41709	0.787631
ANKRD53	-0.052861	0.981872
ANKRD54	-0.141495	0.932654
ANKRD55	0.4993	0.715218
ANKRD61	0.172024	0.919992
ANKRD62	0.139947	0.932654
ANKRD63	-0.221481	0.89407
ANKRD65	0.147856	0.932654
ANKRD66	-0.2157	0.90413
ANKRD6	0.332847	0.805489
ANKRD7	-0.182234	0.911149
ANKRD9	0.0161814	0.995884
ANKS1A	-0.32391	0.815551
ANKS1B	0.0357881	0.987978
ANKS3	-0.0936463	0.95801
ANKS4B	0.0203588	0.993422
ANKS6	-1.07796	0.178577
ANKUB1	-0.201763	0.90424
ANKZF1	-0.491818	0.691674
ANLN	0.0817476	0.970836
ANO10	-0.0892351	0.95853
ANO1	0.439223	0.736655
ANO2	0.389092	0.789531
ANO3	0.0447139	0.982194
ANO4	0.200495	0.907393
ANO5	0.408156	0.851935
ANO6	0.483534	0.697013
ANO7	0.176795	0.919992
ANO8	0.0866514	0.961346
ANO9	0.170936	0.922116
ANP32A	0.207491	0.907393
ANP32B	-0.461625	0.70039
ANP32D	0.350911	0.918915
ANP32E	0.539799	0.644709
ANPEP	-0.244197	0.879813
ANTXR1	-0.986238	0.27751
ANTXR2	-0.152569	0.932654
ANTXRL	0.153988	0.936989
ANXA10	-0.076109	0.966379
ANXA11	0.22849	0.88584
ANXA13	0.000566403	0.999761
ANXA1	-0.195129	0.903071
ANXA2R	0.453768	0.715218
ANXA2	0.0481024	0.982194
ANXA3	0.416094	0.748256
ANXA4	0.0686521	0.970144
ANXA5	-0.291486	0.857468
ANXA6	0.117047	0.942631
ANXA7	-0.448906	0.736655
ANXA9	0.578687	0.671867
AOAH	-0.0595198	0.976122
AOC1	0.356644	0.830678
AOC2	0.0894773	0.95801
AOC3	-0.221757	0.903071
AOX1	0.440113	0.736655
AP001816.1	-0.441925	0.754251
AP003774.4	0.405802	0.761088
AP1AR	-0.053092	0.980366
AP1B1	-0.457347	0.758943
AP1G1	-0.41399	0.746192
AP1G2	0.424868	0.756491
AP1M1	0.275971	0.862596
AP1M2	-0.141818	0.932654
AP1S1	0.402265	0.76825
AP1S2	-0.106172	0.949316
AP1S3	-0.278462	0.862273
AP2A1	-0.311527	0.851077
AP2A2	0.175266	0.912834
AP2B1	-0.190433	0.907393
AP2M1	-0.145418	0.935327
AP2S1	-0.395082	0.761088
AP3B1	-0.0520214	0.981981
AP3B2	0.514519	0.736655
AP3D1	0.932937	0.27725
AP3M1	0.390508	0.753646
AP3M2	-0.358447	0.809591
AP3S1	-0.00166651	0.999419
AP3S2	0.0692634	0.976123
AP4B1	-0.103438	0.949637
AP4E1	0.0167959	0.995941
AP4M1	0.0636225	0.974963
AP4S1	0.174039	0.912113
AP5B1	0.639715	0.567951
AP5M1	-0.548269	0.631289
AP5S1	0.308639	0.847006
AP5Z1	0.404022	0.756631
APAF1	0.0889676	0.961346
APBA1	-0.0985093	0.95305
APBA2	0.161094	0.928864
APBA3	-0.246665	0.873206
APBB1IP	-0.0520272	0.982913
APBB1	-0.0249235	0.991025
APBB2	-0.287726	0.850456
APBB3	0.270398	0.862596
APC2	-0.00704647	0.997221
APCDD1L	0.0509307	0.980596
APCDD1	0.178814	0.910979
APCS	-0.154071	0.928454
APC	0.220356	0.903993
APEH	0.000102774	0.999951
APEX1	-0.405491	0.765162
APEX2	-0.101916	0.958384
APH1A	-0.0859868	0.96522
APH1B	-0.402129	0.751779
API5	1.29095	0.121591
APIP	0.226308	0.881129
APLF	0.0667555	0.970836
APLNR	0.472727	0.715218
APLN	-0.0153453	0.995941
APLP1	-0.176069	0.921932
APLP2	0.579139	0.610316
APMAP	0.557282	0.627248
APOA1BP	-0.409556	0.761088
APOA1	0.0824937	0.96402
APOA2	-0.376267	0.770899
APOA4	-0.515651	0.78907
APOA5	-0.0880404	0.962848
APOBEC1	0.479878	0.746261
APOBEC2	-0.253329	0.86704
APOBEC3A	0.270141	0.858353
APOBEC3B	-0.343142	0.804428
APOBEC3C	0.193669	0.907841
APOBEC3D	0.352841	0.792943
APOBEC3F	0.215988	0.889692
APOBEC3G	0.137998	0.935327
APOBEC3H	0.00277916	0.998664
APOBEC4	-0.298073	0.84786
APOBR	-0.0624038	0.976276
APOB	0.129918	0.935327
APOC1	0.0165675	0.995884
APOC3	0.573858	0.590175
APOC4	-0.000615221	0.999761
APOD	-0.0634521	0.974983
APOE	-0.341586	0.822556
APOF	-0.182162	0.916946
APOH	0.57732	0.590467
APOL1	-0.424221	0.736655
APOL2	-0.518982	0.725228
APOL3	-0.227487	0.888174
APOL4	-1.13701	0.63219
APOL5	-0.328248	0.81219
APOL6	-0.0676648	0.974649
APOLD1	0.069632	0.970836
APOM	-0.10424	0.949756
APOOL	0.203273	0.900743
APOO	0.450192	0.721699
APOPT1	-0.6399	0.736655
APPBP2	-0.317129	0.848798
APPL1	-0.240991	0.887297
APPL2	0.262632	0.871404
APP	0.273384	0.865907
APRT	0.127227	0.942849
APTX	0.152223	0.934226
AQP10	0.867187	0.371967
AQP11	0.104094	0.953313
AQP1	0.411035	0.769051
AQP2	-0.118269	0.955948
AQP3	-0.776216	0.528551
AQP4	0.111502	0.948711
AQP5	0.292274	0.863552
AQP6	-0.116068	0.948711
AQP8	0.733774	0.435943
AQP9	0.0801646	0.96377
AQPEP	0.418461	0.750726
AQR	0.290113	0.846948
ARAF	-0.206169	0.906989
ARAP1	-0.124199	0.938851
ARAP2	-0.361197	0.78795
ARAP3	-0.155152	0.937385
ARCN1	0.79296	0.426091
ARC	-0.152195	0.93351
AREL1	0.130159	0.94489
ARF1	-0.342901	0.807671
ARF3	0.642805	0.59199
ARF4	0.361886	0.824653
ARF5	0.258095	0.867938
ARF6	0.170998	0.915408
ARFGAP1	0.0599265	0.975256
ARFGAP2	0.35141	0.792618
ARFGAP3	-0.0826486	0.962049
ARFGEF1	0.24652	0.871774
ARFGEF2	0.305706	0.835654
ARFIP1	-0.459134	0.70304
ARFIP2	0.00606708	0.99745
ARFRP1	-0.284676	0.853398
ARG1	-0.254815	0.901279
ARG2	0.117512	0.943827
ARGFX	-0.155814	0.931005
ARGLU1	0.102985	0.956526
ARHGAP10	-0.495445	0.670931
ARHGAP11A	0.260519	0.885725
ARHGAP12	-0.568577	0.686502
ARHGAP15	-0.188907	0.919671
ARHGAP17	-0.536902	0.742974
ARHGAP18	0.423745	0.73573
ARHGAP19	0.134107	0.938255
ARHGAP1	-0.363914	0.800655
ARHGAP20	0.480738	0.741644
ARHGAP21	-0.00883958	0.996378
ARHGAP22	0.0129725	0.996148
ARHGAP23	0.131237	0.942237
ARHGAP24	-0.19201	0.906269
ARHGAP25	-0.402774	0.755632
ARHGAP26	0.183073	0.911149
ARHGAP27	0.396987	0.775825
ARHGAP28	0.237101	0.879813
ARHGAP29	-0.69315	0.562361
ARHGAP30	0.461296	0.712837
ARHGAP31	0.0620411	0.979921
ARHGAP32	0.475465	0.694808
ARHGAP33	0.750894	0.426091
ARHGAP35	-0.775779	0.405976
ARHGAP36	-0.256114	0.879813
ARHGAP39	-0.0637332	0.974016
ARHGAP42	0.365472	0.850456
ARHGAP44	-0.202316	0.90287
ARHGAP4	0.27205	0.864808
ARHGAP5	0.395052	0.765162
ARHGAP6	-0.105176	0.952658
ARHGAP8	0.282047	0.864423
ARHGAP9	0.746844	0.412866
ARHGDIA	0.610834	0.558811
ARHGDIB	-0.183863	0.908174
ARHGDIG	0.0130552	0.996179
ARHGEF10L	-0.343512	0.801165
ARHGEF10	-0.383035	0.759111
ARHGEF11	0.201539	0.90424
ARHGEF12	0.92332	0.27751
ARHGEF15	0.313187	0.834837
ARHGEF16	0.216573	0.8888
ARHGEF17	0.50889	0.65101
ARHGEF18	-0.0359831	0.987378
ARHGEF19	-0.156689	0.931005
ARHGEF1	0.0245702	0.991135
ARHGEF25	-0.231554	0.885306
ARHGEF26	0.482648	0.715218
ARHGEF28	-1.0874	0.226731
ARHGEF2	-0.213023	0.895996
ARHGEF33	0.190634	0.919915
ARHGEF37	0.407772	0.792943
ARHGEF38	0.340091	0.802226
ARHGEF39	0.168229	0.919992
ARHGEF3	-0.20562	0.896812
ARHGEF40	-0.0131739	0.996318
ARHGEF4	1.0502	0.307341
ARHGEF5	0.127152	0.941
ARHGEF6	0.135097	0.934721
ARHGEF7	0.0427182	0.984523
ARHGEF9	-0.0474799	0.983577
ARID1A	-0.45257	0.722777
ARID1B	-0.522552	0.671867
ARID2	0.178257	0.915351
ARID3A	0.50834	0.686502
ARID3B	0.254176	0.887276
ARID3C	-0.0740514	0.976479
ARID4A	0.257671	0.869359
ARID4B	-0.524605	0.63602
ARID5A	-0.221077	0.896739
ARID5B	-0.410536	0.771831
ARIH1	-0.640971	0.558093
ARIH2OS	0.0457571	0.982194
ARIH2	0.376778	0.793318
ARL10	1.28715	0.193714
ARL11	-0.0362978	0.986611
ARL13A	0.171982	0.930131
ARL13B	0.0506778	0.980401
ARL14EP	0.434183	0.724499
ARL14	0.029484	0.988795
ARL15	0.286728	0.857468
ARL16	-0.0507043	0.980531
ARL1	0.329353	0.830759
ARL2BP	0.704355	0.715218
ARL2	-0.594737	0.668556
ARL3	-0.0484102	0.981981
ARL4A	0.0528153	0.986957
ARL4C	-0.188617	0.914297
ARL4D	0.113237	0.944949
ARL5A	-0.167381	0.931993
ARL5B	-0.764668	0.447551
ARL5C	0.169261	0.915408
ARL6IP1	-0.0057667	0.997717
ARL6IP4	-0.309762	0.835654
ARL6IP5	-0.435837	0.738864
ARL6IP6	-0.778524	0.396362
ARL6	-0.0859655	0.969339
ARL8A	0.222953	0.887257
ARL8B	-0.304798	0.838701
ARL9	1.16188	0.167215
ARMC10	-0.0224021	0.993422
ARMC12	-0.355104	0.793169
ARMC1	0.0692108	0.970836
ARMC2	-0.403765	0.754726
ARMC3	0.0326435	0.988081
ARMC4	0.327821	0.810134
ARMC5	-0.273295	0.871249
ARMC6	-0.0416584	0.984888
ARMC7	-0.404084	0.754726
ARMC8	-0.00339199	0.998448
ARMC9	0.256835	0.879813
ARMCX1	0.177633	0.920231
ARMCX2	-0.288808	0.869669
ARMCX3	-0.364509	0.783961
ARMCX4	0.015361	0.995941
ARMCX5	0.328769	0.834708
ARMCX6	0.33054	0.825955
ARMS2	-0.31451	0.845196
ARNT2	-0.128132	0.938285
ARNTL2	0.47019	0.715218
ARNTL	0.0760477	0.966379
ARNT	1.51785	0.0279855
ARPC1A	0.0278078	0.991025
ARPC1B	0.435407	0.741644
ARPC2	-0.0874051	0.963244
ARPC3	-0.359708	0.820532
ARPC4	-0.135631	0.935327
ARPC5L	-0.0756681	0.967845
ARPC5	-0.249989	0.871203
ARPP19	-0.0966493	0.960659
ARPP21	0.119793	0.94322
ARR3	-0.39566	0.760753
ARRB1	-0.171035	0.930123
ARRB2	-0.233005	0.880415
ARRDC1	0.306768	0.835569
ARRDC2	-0.0432417	0.982913
ARRDC3	-0.280485	0.851077
ARRDC4	0.298007	0.852134
ARRDC5	-0.548141	0.742767
ARSA	-0.3422	0.813013
ARSB	-0.0377072	0.986185
ARSD	-0.431299	0.816918
ARSE	-0.852793	0.460686
ARSF	-0.14604	0.930123
ARSG	0.0574215	0.979784
ARSH	0.113028	0.947707
ARSI	0.697509	0.447551
ARSJ	-0.118196	0.953183
ARSK	0.0705342	0.972308
ART1	0.204162	0.907393
ART3	-0.176445	0.913067
ART4	0.1874	0.908174
ART5	-0.0421722	0.984418
ARTN	-0.105126	0.950779
ARV1	-0.201379	0.899732
ARVCF	-0.798881	0.400009
ARX	-0.531355	0.678365
AR	-0.739082	0.434034
AS3MT	0.0910906	0.958591
ASAH1	0.296259	0.853398
ASAH2	-0.405669	0.809602
ASAP1	0.5313	0.672228
ASAP2	0.112926	0.948711
ASAP3	-0.621769	0.632696
ASB10	0.440828	0.783119
ASB11	0.166955	0.922021
ASB12	-0.687753	0.614718
ASB13	-0.272199	0.864808
ASB14	-0.641501	0.532356
ASB15	0.188295	0.911223
ASB16	-0.581454	0.649299
ASB17	0.180653	0.910979
ASB18	-0.180421	0.910979
ASB1	-0.260495	0.863728
ASB2	-1.09549	0.27725
ASB4	0.658349	0.532956
ASB5	0.405294	0.776724
ASB6	0.423094	0.766677
ASB7	-0.187295	0.909042
ASB8	0.522617	0.644709
ASB9	-0.787681	0.500423
ASCC1	0.359933	0.793119
ASCC2	0.0727012	0.970133
ASCC3	-0.180905	0.913067
ASCL1	0.192225	0.906598
ASCL2	-0.26311	0.86665
ASCL3	0.326178	0.820601
ASCL4	-0.260183	0.865793
ASCL5	-0.136125	0.934226
ASF1A	0.0357269	0.986785
ASF1B	-0.0641994	0.973351
ASGR1	-0.184279	0.919858
ASGR2	0.348116	0.82508
ASH1L	0.416306	0.761088
ASH2L	-0.236803	0.908174
ASIC1	0.531893	0.715218
ASIC2	0.388523	0.766103
ASIC3	0.322421	0.842156
ASIC4	-0.231058	0.885209
ASIC5	-0.205421	0.898963
ASIP	0.445077	0.729434
ASL	-0.0397009	0.985165
ASNA1	0.109817	0.947707
ASNSD1	0.0501538	0.981981
ASNS	0.265174	0.870901
ASPA	0.0471229	0.981981
ASPDH	-0.29714	0.83941
ASPG	-0.263713	0.868501
ASPHD1	0.222559	0.888101
ASPHD2	-0.12087	0.94746
ASPH	-0.324583	0.848798
ASPM	-0.487209	0.692321
ASPN	0.611567	0.579871
ASPRV1	-0.0842926	0.962049
ASPSCR1	0.183359	0.911149
ASRGL1	0.100198	0.953183
ASS1	0.293226	0.857468
ASTE1	0.0409036	0.985165
ASTL	-0.416037	0.758289
ASTN1	-0.239357	0.874509
ASTN2	-0.0900832	0.961346
ASUN	0.360705	0.79224
ASXL1	-0.231383	0.885209
ASXL2	0.353758	0.815551
ASXL3	-0.273303	0.878342
ASZ1	-0.00362846	0.998127
ATAD1	-0.76405	0.444026
ATAD2B	-0.350249	0.813013
ATAD2	-0.696655	0.450254
ATAD3A	0.444579	0.791411
ATAD3B	0.204517	0.90287
ATAD3C	0.13496	0.934226
ATAD5	-0.445343	0.736655
ATAT1	0.0924178	0.961225
ATCAY	-0.0476377	0.982194
ATE1	-0.240119	0.879365
ATF1	0.453162	0.760753
ATF2	0.157577	0.934721
ATF3	-0.0168401	0.995884
ATF4	0.407688	0.766677
ATF5	0.103914	0.958291
ATF6B	-0.452557	0.736655
ATF6	0.180908	0.911149
ATF7IP2	0.10254	0.949756
ATF7IP	-0.758492	0.649299
ATF7	0.227078	0.896218
ATG10	0.842849	0.343498
ATG12	0.69082	0.488504
ATG13	0.288041	0.854368
ATG14	0.980124	0.289168
ATG16L1	0.120724	0.941
ATG16L2	-0.0702359	0.970133
ATG2A	-0.403471	0.770235
ATG2B	0.321575	0.83941
ATG3	0.677466	0.496135
ATG4A	-0.0607954	0.975927
ATG4B	-0.0327559	0.987978
ATG4C	0.184327	0.911149
ATG4D	-0.464775	0.699606
ATG5	0.262285	0.863552
ATG7	-0.143883	0.944252
ATG9A	0.259499	0.865681
ATHL1	0.132955	0.939944
ATIC	0.568197	0.671867
ATL1	0.0257699	0.991017
ATL2	0.0982934	0.956526
ATL3	-0.180857	0.914542
ATMIN	-0.954625	0.289598
ATM	0.0521086	0.980401
ATN1	0.0245923	0.991027
ATOH1	-0.523821	0.682496
ATOH7	-0.116857	0.947707
ATOH8	0.319458	0.820601
ATOX1	-0.29695	0.842811
ATP10A	0.639042	0.546003
ATP10B	0.186748	0.924367
ATP10D	-0.31473	0.824386
ATP11A	0.0115115	0.996318
ATP11B	0.0637037	0.974009
ATP11C	0.0360271	0.986992
ATP12A	-0.21531	0.89111
ATP13A1	-0.0697398	0.969375
ATP13A2	-0.0221181	0.993422
ATP13A3	0.105292	0.954397
ATP13A4	0.0516806	0.980531
ATP13A5	0.043994	0.984219
ATP1A1	-0.827871	0.377607
ATP1A2	0.160615	0.931734
ATP1A3	-0.414158	0.759018
ATP1A4	-0.105633	0.948711
ATP1B1	-0.367884	0.815707
ATP1B2	-0.0448894	0.983086
ATP1B3	0.210436	0.907393
ATP1B4	0.208916	0.900914
ATP2A1	0.590001	0.598375
ATP2A2	-0.146522	0.932654
ATP2A3	-0.135703	0.935597
ATP2B1	-0.733513	0.446192
ATP2B2	-0.147119	0.932654
ATP2B3	0.402289	0.754237
ATP2B4	-0.717026	0.570754
ATP2C1	-0.4976	0.666076
ATP2C2	0.814352	0.473769
ATP4A	0.0238353	0.993308
ATP4B	0.40181	0.793318
ATP5A1	1.57683	0.0308593
ATP5B	1.68298	0.0102981
ATP5C1	0.742359	0.513779
ATP5D	0.326513	0.86107
ATP5F1	0.726375	0.520357
ATP5G1	-0.521173	0.736655
ATP5G2	0.0741322	0.966379
ATP5G3	0.0517906	0.982913
ATP5H	0.807832	0.455757
ATP5I	0.576801	0.644709
ATP5J2	-0.973341	0.709129
ATP5J	0.510989	0.671867
ATP5L2	-0.588041	0.852134
ATP5L	0.00151202	0.999599
ATP5O	1.20509	0.191265
ATP5SL	0.38487	0.759929
ATP5S	0.487806	0.709129
ATP6AP1L	0.108282	0.95801
ATP6AP1	0.188334	0.91494
ATP6AP2	0.415976	0.756591
ATP6V0A1	-0.325843	0.815358
ATP6V0A2	0.432541	0.780567
ATP6V0A4	-0.149042	0.935327
ATP6V0B	-0.558418	0.712837
ATP6V0C	0.577969	0.595858
ATP6V0D1	-0.0400124	0.986611
ATP6V0D2	0.25639	0.877839
ATP6V0E1	0.0237964	0.993308
ATP6V0E2	0.0350115	0.988223
ATP6V1A	0.423591	0.776724
ATP6V1B1	-0.0203523	0.993524
ATP6V1B2	-0.0470266	0.983454
ATP6V1C1	0.312015	0.851077
ATP6V1C2	-0.199835	0.913418
ATP6V1D	0.580062	0.649575
ATP6V1E1	0.0695118	0.971609
ATP6V1E2	0.155533	0.924738
ATP6V1F	0.0510228	0.981981
ATP6V1G1	0.652229	0.532956
ATP6V1G2	0.51085	0.651899
ATP6V1G3	0.201365	0.90287
ATP6V1H	0.216489	0.911223
ATP7A	0.27386	0.862649
ATP7B	-0.0917232	0.961033
ATP8A1	0.137445	0.933702
ATP8A2	0.00347698	0.998424
ATP8B1	0.5031	0.665618
ATP8B2	-0.277982	0.858353
ATP8B3	0.293068	0.893701
ATP8B4	-0.0950519	0.95801
ATP9A	-0.194334	0.907393
ATP9B	-0.213609	0.911549
ATPAF1	0.854689	0.331207
ATPAF2	0.75412	0.426091
ATPIF1	-0.515186	0.689
ATRAID	0.862891	0.360528
ATRIP	0.292671	0.84776
ATRNL1	-0.0220293	0.993422
ATRN	0.13627	0.935327
ATRX	-0.413644	0.750325
ATR	-0.462639	0.707888
ATXN10	-0.528154	0.675374
ATXN1L	0.786086	0.384999
ATXN1	0.699954	0.453245
ATXN2L	-1.02414	0.226731
ATXN2	-0.306678	0.835569
ATXN3L	0.094649	0.955206
ATXN3	0.606535	0.648676
ATXN7L1	-0.0762234	0.965902
ATXN7L2	-0.184247	0.911149
ATXN7L3B	-0.485246	0.753694
ATXN7L3	0.273619	0.865681
ATXN7	0.660221	0.495541
AUH	0.25361	0.871249
AUNIP	0.159889	0.919992
AUP1	0.322932	0.839597
AURKAIP1	0.954806	0.35357
AURKA	0.587301	0.598375
AURKB	-0.0628928	0.983399
AURKC	-0.116102	0.944252
AUTS2	0.794654	0.42225
AVEN	-0.443655	0.732839
AVIL	0.323819	0.812456
AVL9	0.255617	0.866982
AVPI1	0.424014	0.766677
AVPR1A	-0.00903465	0.996378
AVPR1B	0.132939	0.935394
AVPR2	-0.376628	0.776183
AVP	0.471081	0.715218
AWAT1	0.543992	0.718719
AWAT2	-0.622758	0.61402
AXDND1	-0.200545	0.909708
AXIN1	1.00375	0.25712
AXIN2	-0.582433	0.664232
AXL	-0.969714	0.265664
AZGP1	0.456657	0.715218
AZI1	-0.000690131	0.999761
AZI2	-0.0943032	0.95801
AZIN1	0.21304	0.898623
AZU1	-0.593502	0.598375
B2M	-0.313579	0.831243
B3GALNT1	0.00269134	0.998645
B3GALNT2	-0.206506	0.90424
B3GALT1	-0.544241	0.649299
B3GALT2	0.253817	0.869669
B3GALT4	-0.383159	0.805856
B3GALT5	0.178129	0.914297
B3GALT6	0.434351	0.840979
B3GALTL	-0.959738	0.301503
B3GAT1	-0.210404	0.907393
B3GAT2	-1.36256	0.073666
B3GAT3	-0.317731	0.835654
B3GNT1	-0.155168	0.936405
B3GNT2	-0.428481	0.787893
B3GNT3	-0.0946557	0.954397
B3GNT4	-0.960341	0.478784
B3GNT5	0.386296	0.766677
B3GNT6	0.0912664	0.95801
B3GNT7	-0.399563	0.760753
B3GNT8	0.129205	0.938255
B3GNT9	-0.0264516	0.991135
B3GNTL1	-0.116757	0.944252
B4GALNT1	0.311238	0.858568
B4GALNT2	0.2123	0.90718
B4GALNT3	0.271525	0.859076
B4GALNT4	0.457059	0.715218
B4GALT1	-0.00407481	0.998127
B4GALT2	-0.347288	0.804205
B4GALT3	-0.165448	0.924451
B4GALT4	0.605978	0.608978
B4GALT5	0.185462	0.909564
B4GALT6	-0.17434	0.916939
B4GALT7	0.234705	0.879813
B9D1	0.554033	0.610316
B9D2	0.212687	0.89407
BAALC	-0.00221023	0.99934
BAAT	-0.265855	0.869638
BABAM1	-0.066569	0.97445
BACE1	0.318288	0.847006
BACE2	-0.0702429	0.970133
BACH1	-0.508165	0.697013
BACH2	0.598549	0.590467
BAD	-0.217019	0.889692
BAG1	-0.49326	0.685085
BAG2	-0.00821889	0.996378
BAG3	-0.243896	0.881133
BAG4	0.113948	0.954397
BAG5	0.175982	0.915408
BAG6	0.370338	0.822843
BAHD1	-0.385618	0.772412
BAI1	0.118317	0.942237
BAI2	-0.292327	0.850042
BAI3	-0.305178	0.842156
BAIAP2L1	0.291241	0.850456
BAIAP2L2	0.288761	0.847006
BAIAP2	0.428231	0.736655
BAIAP3	-0.245014	0.879813
BAK1	0.443473	0.725228
BAMBI	-0.467743	0.718358
BANF1	-0.310677	0.836776
BANF2	0.0422075	0.987183
BANK1	-0.245916	0.896218
BANP	-0.422473	0.788167
BAP1	0.529557	0.66411
BARD1	0.419911	0.736655
BARHL1	-0.132097	0.935597
BARHL2	-0.182522	0.908174
BARX1	0.0310756	0.989817
BARX2	-0.0360881	0.986968
BASP1	-0.0285676	0.989558
BATF2	0.381606	0.761088
BATF3	0.268622	0.86198
BATF	0.445806	0.737305
BAX	0.0990457	0.95273
BAZ1A	-0.388589	0.811007
BAZ1B	-0.430662	0.736655
BAZ2A	-0.0675067	0.97185
BAZ2B	0.265157	0.871358
BBC3	-0.89127	0.29442
BBIP1	0.3529	0.790911
BBOX1	0.41986	0.746606
BBS10	0.102823	0.953081
BBS12	0.307097	0.835569
BBS1	-0.17218	0.918692
BBS2	-0.741807	0.428826
BBS4	0.172356	0.913418
BBS5	0.000278162	0.999921
BBS7	0.543729	0.684213
BBS9	0.142843	0.931957
BBX	0.52763	0.679065
BCAM	0.0543195	0.979378
BCAN	0.382335	0.788668
BCAP29	0.17675	0.917349
BCAP31	-0.61136	0.627248
BCAR1	-0.0531702	0.983089
BCAR3	-0.267933	0.86107
BCAS1	-0.086347	0.962049
BCAS2	-0.0337241	0.988179
BCAS3	-0.383502	0.81643
BCAS4	0.135165	0.943886
BCAT1	0.266742	0.861773
BCAT2	0.26623	0.868494
BCCIP	-0.420501	0.756393
BCDIN3D	-0.659578	0.657319
BCHE	0.330605	0.818967
BCKDHA	-0.112159	0.950979
BCKDHB	-0.562924	0.644709
BCKDK	0.493279	0.672228
BCL10	-0.401136	0.751012
BCL11A	-0.415373	0.736655
BCL11B	-0.0105232	0.99635
BCL2A1	0.287276	0.871845
BCL2L10	-1.07632	0.221093
BCL2L11	-0.674435	0.515601
BCL2L12	0.120712	0.950979
BCL2L13	-0.278085	0.907033
BCL2L14	0.269802	0.858353
BCL2L15	-0.135667	0.934226
BCL2L1	-0.138934	0.934226
BCL2L2	0.281014	0.877425
BCL2	-0.208138	0.897026
BCL3	0.491302	0.69554
BCL6B	-0.430639	0.756393
BCL6	-0.145851	0.931734
BCL7A	0.0894007	0.960659
BCL7B	0.242563	0.871845
BCL7C	0.556506	0.670931
BCL9L	0.114694	0.956526
BCL9	0.10534	0.958543
BCLAF1	0.589218	0.597665
BCMO1	0.0173121	0.995287
BCO2	0.217892	0.901279
BCORL1	0.12465	0.938255
BCOR	-0.330258	0.838701
BCR	-0.0503049	0.980531
BCS1L	0.420415	0.749905
BDH1	0.382051	0.761998
BDH2	0.179623	0.919416
BDKRB1	-0.192873	0.922021
BDKRB2	0.186847	0.913418
BDNF	0.0281149	0.990055
BDP1	-0.467032	0.831729
BEAN1	-0.392817	0.755632
BECN1	-0.0579104	0.976952
BEGAIN	0.0953103	0.955998
BEND2	0.0102258	0.996378
BEND3	-0.420736	0.750719
BEND4	0.2833	0.848798
BEND5	0.406888	0.752581
BEND6	-0.349492	0.835569
BEND7	-0.0767851	0.967845
BEST1	-0.0638325	0.974859
BEST2	-0.492234	0.699703
BEST3	0.547685	0.6582
BEST4	0.72784	0.435645
BET1L	0.796044	0.41336
BET1	-0.614274	0.644913
BEX1	0.624812	0.532356
BEX2	-0.973897	0.502232
BEX4	0.166012	0.919992
BEX5	0.0101607	0.99635
BFAR	-0.0235456	0.993737
BFSP1	-0.407398	0.755632
BFSP2	0.817667	0.437415
BGLAP	0.42417	0.759912
BGN	-0.0737671	0.967845
BHLHA15	0.43497	0.732839
BHLHA9	-0.211683	0.89407
BHLHB9	-0.103196	0.953556
BHLHE22	0.227698	0.882449
BHLHE23	-0.0697803	0.970133
BHLHE40	0.394164	0.761088
BHLHE41	-0.161962	0.929472
BHMT2	0.359872	0.816459
BHMT	0.137038	0.934226
BICC1	-0.532213	0.632616
BICD1	0.166116	0.929905
BICD2	-0.125469	0.944949
BID	-0.426425	0.731348
BIK	-0.274939	0.858353
BIN1	-0.224577	0.90287
BIN2	0.895463	0.460063
BIN3	-0.104324	0.955998
BIRC2	0.878625	0.307341
BIRC3	0.189463	0.908084
BIRC5	-0.515358	0.712837
BIRC6	0.927272	0.262843
BIRC7	0.223327	0.88913
BIRC8	0.0949834	0.95777
BIVM	0.328828	0.851269
BLACE	-0.395104	0.785249
BLCAP	0.122755	0.941
BLID	-0.236474	0.876407
BLK	-0.253713	0.867127
BLMH	-0.193029	0.90413
BLM	-0.403954	0.761088
BLNK	0.0665648	0.973351
BLOC1S1	0.242122	0.879813
BLOC1S2	0.424723	0.734608
BLOC1S3	0.208612	0.898963
BLOC1S4	-0.4147	0.742974
BLOC1S5	-0.127497	0.937099
BLOC1S6	-0.137531	0.934226
BLVRA	0.182343	0.911149
BLVRB	-0.0277769	0.990238
BLZF1	0.311924	0.856076
BMF	-0.0453059	0.982913
BMI1	-0.142458	0.932654
BMP10	0.568476	0.595858
BMP15	-0.038893	0.986599
BMP1	0.529735	0.665618
BMP2K	0.473341	0.732839
BMP2	0.36013	0.779847
BMP3	0.0534475	0.980266
BMP4	-0.19696	0.910979
BMP5	0.212904	0.891866
BMP6	-0.581385	0.63219
BMP7	0.822587	0.380014
BMP8A	0.595956	0.664047
BMP8B	-0.320144	0.927328
BMPER	0.597618	0.578803
BMPR1A	0.420711	0.79631
BMPR1B	-0.0453769	0.985493
BMPR2	0.406405	0.807535
BMS1	-0.383404	0.811898
BMX	-0.437482	0.896739
BNC1	0.0238541	0.992253
BNC2	-0.395553	0.761088
BNIP1	-0.60813	0.562766
BNIP2	0.109373	0.95801
BNIP3L	-0.327036	0.810134
BNIP3	0.041542	0.986185
BNIPL	0.0376862	0.988053
BOC	-0.16249	0.920916
BOD1L1	-1.22337	0.14675
BOD1L2	0.288898	0.848062
BOD1	1.34956	0.532356
BOK	0.0725886	0.969013
BOLA1	-0.274383	0.858794
BOLA3	-0.0690398	0.976985
BOLL	0.615027	0.599208
BOP1	-0.419078	0.736655
BORA	-0.874305	0.466188
BPGM	-0.135516	0.933511
BPHL	0.200522	0.900522
BPIFA1	0.150086	0.932654
BPIFA2	0.17158	0.918376
BPIFA3	-0.163681	0.92346
BPIFB1	0.395016	0.749054
BPIFB2	-0.41945	0.748256
BPIFB3	0.555795	0.650017
BPIFB4	0.417761	0.755456
BPIFB6	-0.0829368	0.963913
BPIFC	0.0446136	0.983646
BPI	0.861489	0.34517
BPNT1	0.591277	0.605451
BPTF	-1.05147	0.226731
BRAF	0.518038	0.695165
BRAP	-0.386335	0.79256
BRAT1	0.121016	0.942631
BRCA1	0.210856	0.907826
BRCA2	-0.332528	0.851077
BRCC3	0.405924	0.751779
BRD1	-0.697749	0.483044
BRD2	0.572394	0.628671
BRD3	-0.390965	0.756393
BRD4	-0.306863	0.842198
BRD7	-0.203214	0.907841
BRD8	1.03922	0.27751
BRD9	1.34728	0.206123
BRDT	-0.215291	0.894235
BRE	0.463604	0.71223
BRF1	-0.360496	0.783119
BRF2	0.195972	0.910979
BRI3BP	0.174763	0.928454
BRI3	-0.162515	0.920916
BRICD5	-0.400857	0.750325
BRINP1	-0.129772	0.935365
BRINP2	-0.213595	0.90424
BRINP3	0.0927664	0.959037
BRIP1	-0.63371	0.532356
BRIX1	0.506122	0.736655
BRK1	-0.383689	0.870092
BRMS1L	-0.241087	0.896812
BRMS1	-0.484785	0.742974
BROX	0.45057	0.729499
BRPF1	0.93509	0.279892
BRPF3	1.01324	0.201097
BRS3	0.23553	0.888524
BRSK1	0.020935	0.993422
BRSK2	0.277871	0.851077
BRWD1	-0.614046	0.589583
BRWD3	0.147744	0.931734
BSCL2	0.430536	0.736655
BSDC1	0.323397	0.825321
BSG	-0.520867	0.649299
BSND	-0.760646	0.409518
BSN	-0.0120609	0.996148
BSPH1	-0.012174	0.996318
BSPRY	0.311066	0.848697
BST1	-0.374243	0.771333
BST2	-0.356536	0.822078
BSX	0.036734	0.986992
BTAF1	0.093047	0.958291
BTBD10	0.0415376	0.985056
BTBD11	-0.0759307	0.966799
BTBD16	-0.641918	0.564369
BTBD17	0.0936862	0.957135
BTBD18	-0.223263	0.901277
BTBD19	0.865608	0.319106
BTBD1	-0.182716	0.915408
BTBD2	0.259769	0.900914
BTBD3	0.183766	0.919903
BTBD6	0.546448	0.649575
BTBD7	0.256584	0.869669
BTBD8	0.132209	0.935327
BTBD9	-0.555347	0.686502
BTC	-0.0666153	0.975256
BTD	0.398403	0.804428
BTF3L4	-0.644888	0.644709
BTF3	-0.0127103	0.996378
BTG1	0.942159	0.27725
BTG2	-0.721249	0.487401
BTG3	0.235093	0.879813
BTG4	-0.167143	0.919671
BTK	0.374373	0.792943
BTLA	-0.0513456	0.981981
BTN1A1	-0.193539	0.911149
BTN2A1	-0.510727	0.648676
BTN2A2	0.111605	0.952658
BTN3A1	-0.327004	0.820601
BTN3A2	0.277356	0.907033
BTN3A3	0.00443442	0.998127
BTNL3	-0.305303	0.892192
BTNL8	0.411607	0.747271
BTNL9	0.0929031	0.962049
BTRC	-0.0859644	0.966474
BUB1B	0.46981	0.750726
BUB1	-0.16991	0.92346
BUB3	-0.114235	0.949316
BUD13	0.0180708	0.996179
BUD31	-0.173603	0.92398
BVES	-0.106155	0.949316
BYSL	-0.103984	0.958291
BZRAP1	-0.367386	0.840174
BZW1	-0.310475	0.851077
BZW2	0.2108	0.90413
C10orf105	0.253457	0.86704
C10orf107	-0.016905	0.995884
C10orf10	-0.269063	0.857599
C10orf111	-0.210515	0.896218
C10orf113	-0.0511454	0.982793
C10orf115	0.452947	0.709705
C10orf118	0.054334	0.979564
C10orf11	-0.43381	0.742974
C10orf120	0.119075	0.944252
C10orf126	0.0213307	0.993422
C10orf128	-0.362508	0.780294
C10orf129	0.185251	0.919992
C10orf12	0.11072	0.947707
C10orf131	0.434196	0.736655
C10orf137	0.103299	0.953277
C10orf25	-0.0916566	0.970133
C10orf2	0.315983	0.85371
C10orf32	-0.732399	0.426091
C10orf35	0.107319	0.947852
C10orf40	-0.348501	0.791694
C10orf53	0.141705	0.932654
C10orf54	0.238661	0.879813
C10orf55	-0.279991	0.859125
C10orf62	0.0157581	0.995884
C10orf67	0.226733	0.889649
C10orf68	0.438235	0.760599
C10orf71	-0.434389	0.73573
C10orf76	0.126309	0.948711
C10orf82	0.130441	0.942631
C10orf85	0.00448808	0.998102
C10orf88	-0.183649	0.910979
C10orf90	0.0311563	0.989817
C10orf91	-0.0668344	0.975256
C10orf95	-0.10813	0.950153
C10orf99	-0.370483	0.767065
C11orf16	-0.0563898	0.976952
C11orf1	0.257684	0.869898
C11orf21	-0.0358765	0.987978
C11orf24	-0.0561756	0.990715
C11orf30	-0.204864	0.899219
C11orf31	0.704924	0.54072
C11orf35	0.0851859	0.965506
C11orf40	0.225661	0.881641
C11orf42	0.0463178	0.983399
C11orf44	0.55751	0.650017
C11orf45	0.36249	0.804289
C11orf48	0.595486	0.585421
C11orf49	0.205023	0.901279
C11orf52	-0.0194087	0.994233
C11orf53	0.339	0.804289
C11orf54	0.20658	0.896218
C11orf57	0.0101065	0.99635
C11orf58	0.143309	0.936027
C11orf63	0.447653	0.740932
C11orf65	-0.0747857	0.9681
C11orf68	0.190782	0.907393
C11orf70	0.34312	0.847006
C11orf71	0.0111633	0.99635
C11orf72	-0.230388	0.90424
C11orf73	1.09454	0.175256
C11orf74	0.83363	0.604732
C11orf80	0.016094	0.995884
C11orf82	-0.332361	0.82365
C11orf83	0.165382	0.928864
C11orf84	0.219913	0.908174
C11orf85	0.0488158	0.982068
C11orf86	0.709568	0.528076
C11orf87	0.0532439	0.979621
C11orf88	0.349789	0.820601
C11orf89	0.159495	0.93351
C11orf91	0.298228	0.838201
C11orf94	-0.0874139	0.970133
C11orf96	0.616232	0.593141
C12orf10	0.482982	0.715218
C12orf23	0.606421	0.615007
C12orf29	-0.131191	0.935327
C12orf36	-0.418437	0.739376
C12orf39	-0.070822	0.969339
C12orf40	0.123844	0.942237
C12orf42	0.723748	0.532356
C12orf43	-0.214099	0.930131
C12orf44	0.766233	0.487758
C12orf45	-0.665809	0.553711
C12orf49	0.62245	0.544066
C12orf4	-0.0675527	0.974963
C12orf50	0.28372	0.850061
C12orf52	0.395744	0.78477
C12orf54	-0.271964	0.877037
C12orf55	0.174536	0.932654
C12orf56	-0.0162137	0.995884
C12orf57	0.00422535	0.998127
C12orf5	-0.351304	0.810253
C12orf60	0.0980794	0.955998
C12orf61	0.304528	0.844019
C12orf65	0.419241	0.760753
C12orf66	0.264157	0.870823
C12orf68	0.202507	0.90287
C12orf71	0.112513	0.950779
C12orf73	0.0560209	0.981981
C12orf74	0.261168	0.881126
C12orf75	0.315432	0.835654
C12orf76	0.486595	0.686128
C12orf77	-0.0881	0.966736
C13orf35	0.0659046	0.973969
C14orf105	0.00225634	0.999044
C14orf119	0.262174	0.871774
C14orf132	0.242891	0.874509
C14orf142	-0.351316	0.848798
C14orf159	-0.0846027	0.965902
C14orf164	0.0790837	0.966474
C14orf166B	0.0369446	0.987183
C14orf166	-0.160487	0.920231
C14orf177	-0.179417	0.911768
C14orf178	0.00669419	0.99745
C14orf180	-0.240901	0.879813
C14orf182	0.742342	0.541179
C14orf183	-0.0103112	0.99635
C14orf1	-0.236818	0.879813
C14orf23	0.0456386	0.983784
C14orf28	-0.505241	0.69554
C14orf2	-0.353726	0.873951
C14orf37	-0.70105	0.532356
C14orf39	0.391742	0.763876
C14orf79	-0.129124	0.95273
C14orf80	0.0253313	0.991025
C14orf93	0.111245	0.950947
C15orf26	-0.026954	0.99229
C15orf27	-0.297883	0.843549
C15orf32	-0.0752503	0.974785
C15orf37	-0.19559	0.914749
C15orf38	0.395345	0.858568
C15orf39	0.419264	0.753694
C15orf40	0.228647	0.893701
C15orf41	-0.348509	0.851077
C15orf43	0.0867303	0.964817
C15orf48	-0.273688	0.857468
C15orf52	0.522531	0.66411
C15orf53	-0.723352	0.489683
C15orf54	0.0413557	0.984418
C15orf56	-0.0832933	0.964686
C15orf57	-0.539333	0.631289
C15orf59	-0.576318	0.608216
C15orf60	0.200252	0.907393
C15orf61	0.306003	0.858794
C15orf62	-0.240497	0.881641
C16orf11	0.137511	0.938285
C16orf13	-0.377276	0.783281
C16orf3	0.0496382	0.98165
C16orf45	0.620249	0.555752
C16orf46	0.434004	0.723166
C16orf47	0.0154656	0.995941
C16orf52	-0.159181	0.920916
C16orf54	-0.154912	0.923895
C16orf58	0.161007	0.924694
C16orf59	-0.0214276	0.993422
C16orf62	-0.160636	0.922545
C16orf70	0.161486	0.934226
C16orf71	0.213725	0.907393
C16orf72	0.00504899	0.998127
C16orf74	-0.434083	0.758289
C16orf78	0.672212	0.498246
C16orf80	0.522961	0.644709
C16orf86	0.301937	0.84776
C16orf87	0.0217722	0.993663
C16orf89	0.834897	0.36105
C16orf90	-0.525635	0.664047
C16orf91	0.208859	0.895354
C16orf92	0.0151995	0.995941
C16orf93	-0.179506	0.912534
C16orf95	-0.0470947	0.981981
C16orf96	1.09847	0.195458
C16orf97	-0.462474	0.715218
C16orf98	0.986357	0.558811
C17orf100	-0.119873	0.948283
C17orf102	-0.0950653	0.955771
C17orf104	-0.0498804	0.981981
C17orf105	0.245438	0.871795
C17orf107	0.0121	0.996318
C17orf112	0.169413	0.914625
C17orf47	-0.153974	0.930123
C17orf49	0.0481651	0.992253
C17orf50	0.0241957	0.992116
C17orf51	-1.08949	0.201097
C17orf53	-0.675888	0.564369
C17orf58	-0.431224	0.736655
C17orf59	-0.384666	0.766923
C17orf62	-0.03976	0.985493
C17orf64	-0.61213	0.610316
C17orf66	-0.0439448	0.983399
C17orf67	0.258747	0.866513
C17orf70	-0.69435	0.497999
C17orf72	-0.14721	0.932654
C17orf74	0.354052	0.792943
C17orf75	-0.451735	0.719469
C17orf77	-0.0850193	0.96522
C17orf78	0.0320257	0.988498
C17orf80	0.244542	0.879365
C17orf82	-0.0597648	0.979523
C17orf85	0.19736	0.911768
C17orf89	-0.161312	0.94093
C17orf96	0.375403	0.805207
C17orf97	-0.230377	0.892548
C17orf98	-0.184615	0.911149
C17orf99	0.557895	0.619973
C18orf21	-0.402745	0.743503
C18orf25	-0.0914272	0.958333
C18orf42	0.254852	0.869669
C18orf54	-0.555617	0.627248
C18orf63	0.67924	0.516613
C18orf8	0.0456359	0.982913
C19orf10	-0.724753	0.442622
C19orf12	0.240046	0.879813
C19orf18	0.333153	0.830359
C19orf24	0.130505	0.941
C19orf25	-0.295455	0.858353
C19orf26	0.0837603	0.964686
C19orf33	0.0977437	0.963082
C19orf35	0.127888	0.935597
C19orf38	0.466976	0.715218
C19orf40	-0.193862	0.913418
C19orf43	0.524837	0.665618
C19orf44	0.305452	0.838815
C19orf45	0.0491164	0.982913
C19orf47	0.0227564	0.992607
C19orf48	0.0348059	0.987978
C19orf52	0.43069	0.763876
C19orf53	0.410833	0.759149
C19orf54	0.170311	0.929504
C19orf55	-0.0840028	0.96402
C19orf57	0.0859176	0.962583
C19orf59	0.499509	0.71223
C19orf60	-0.472318	0.709451
C19orf66	0.170337	0.917349
C19orf67	0.0438139	0.985056
C19orf68	-0.135637	0.934226
C19orf70	-0.170996	0.919671
C19orf71	-0.0421494	0.983577
C19orf73	0.310514	0.84041
C19orf77	0.0187003	0.995142
C19orf80	-0.0391261	0.9878
C19orf81	-0.182944	0.911149
C1D	-0.0988549	0.970836
C1GALT1C1	0.22824	0.88913
C1GALT1	0.543662	0.627248
C1QA	-0.329505	0.851269
C1QBP	0.663235	0.575595
C1QB	0.227348	0.891678
C1QC	-0.165163	0.919617
C1QL1	-0.111979	0.947707
C1QL2	0.320537	0.851077
C1QL3	-0.21287	0.892919
C1QL4	0.482298	0.743255
C1QTNF1	-0.138151	0.934226
C1QTNF2	0.241968	0.879813
C1QTNF3	-0.265966	0.87562
C1QTNF4	0.124995	0.947313
C1QTNF5	0.268792	0.870092
C1QTNF6	-0.33277	0.81099
C1QTNF7	-0.521422	0.642511
C1QTNF8	0.00692139	0.997244
C1RL	-0.0275362	0.991025
C1S	0.179735	0.911768
C1orf100	-0.128649	0.935597
C1orf101	-0.113946	0.947707
C1orf105	-0.427569	0.732839
C1orf106	-0.527401	0.665618
C1orf109	0.266498	0.871404
C1orf110	0.0101638	0.99635
C1orf111	0.176142	0.911549
C1orf112	0.0587317	0.979523
C1orf115	0.38936	0.798729
C1orf116	-0.54766	0.644709
C1orf122	-0.229846	0.879813
C1orf123	-0.205643	0.913418
C1orf131	-1.06266	0.440956
C1orf137	-0.504254	0.721699
C1orf141	-0.0229193	0.993737
C1orf145	0.260711	0.938401
C1orf146	0.789592	0.632616
C1orf147	-0.0467072	0.982194
C1orf158	0.187207	0.909564
C1orf159	0.406265	0.791039
C1orf162	0.367485	0.777864
C1orf168	-0.271055	0.857468
C1orf170	0.531059	0.63199
C1orf172	-0.407093	0.752492
C1orf173	-0.201855	0.900914
C1orf174	-0.225834	0.889983
C1orf177	0.348728	0.825321
C1orf180	-0.287262	0.861773
C1orf185	-0.0915911	0.95777
C1orf186	0.188283	0.908174
C1orf189	-0.176166	0.911549
C1orf192	0.510632	0.686502
C1orf194	-0.0362319	0.987378
C1orf195	-0.0696257	0.969339
C1orf198	-0.179028	0.915272
C1orf200	-0.314581	0.83364
C1orf204	0.303566	0.838815
C1orf210	-0.0205974	0.994957
C1orf213	0.440387	0.785249
C1orf216	-0.0605277	0.976952
C1orf21	-0.225493	0.88584
C1orf220	-0.214221	0.895354
C1orf226	-0.0155998	0.995884
C1orf227	0.255991	0.864808
C1orf228	-0.496309	0.706079
C1orf229	0.887032	0.416362
C1orf233	-0.116902	0.957819
C1orf27	-0.0961381	0.959418
C1orf35	-0.591401	0.584699
C1orf43	-0.0742111	0.967845
C1orf50	0.18537	0.907393
C1orf51	0.339226	0.838701
C1orf52	-0.120281	0.941779
C1orf53	-0.339325	0.81132
C1orf54	0.252132	0.870092
C1orf56	-0.0308108	0.989817
C1orf61	-0.110685	0.948711
C1orf63	0.245406	0.896218
C1orf64	-0.0357228	0.987272
C1orf65	0.154422	0.931005
C1orf68	-0.262289	0.86198
C1orf74	-0.634379	0.533445
C1orf85	-0.0215603	0.993422
C1orf86	-0.308665	0.829662
C1orf87	-0.19547	0.907841
C1orf94	0.274722	0.857468
C1orf95	-0.431612	0.733688
C20orf112	-0.0263239	0.991135
C20orf141	0.457247	0.709129
C20orf144	-0.232471	0.911149
C20orf166	0.221227	0.89828
C20orf173	0.035261	0.987351
C20orf187	0.501419	0.794756
C20orf194	0.889973	0.355574
C20orf195	-0.00251717	0.998664
C20orf196	0.135669	0.934226
C20orf197	0.296558	0.863552
C20orf201	0.362577	0.838701
C20orf202	0.292264	0.848062
C20orf24	0.0623007	0.975256
C20orf26	-0.486906	0.719388
C20orf27	0.14084	0.934226
C20orf62	0.0324085	0.990324
C20orf78	0.357932	0.789396
C20orf85	0.138801	0.935327
C20orf96	0.715865	0.532356
C21orf119	0.150867	0.927328
C21orf128	-0.527148	0.712837
C21orf2	0.165425	0.919992
C21orf33	-0.0745256	0.973683
C21orf37	-0.246498	0.94342
C21orf49	0.284161	0.850456
C21orf54	-0.516471	0.67551
C21orf58	-0.185536	0.911149
C21orf59	0.236729	0.899732
C21orf62	0.417644	0.738601
C21orf67	-0.206387	0.90358
C21orf88	-0.121486	0.943053
C21orf90	-0.159908	0.925935
C21orf91	-0.154113	0.932654
C22orf15	-0.135537	0.935394
C22orf23	-0.0982963	0.956606
C22orf24	-0.0426741	0.983089
C22orf26	-0.695284	0.461349
C22orf29	0.222298	0.889692
C22orf31	-0.112578	0.945088
[truncated: 16,047 more rows]
