# Supplementary material for: Paralogous synthetic lethality underlies genetic dependencies of the cancer-mutated gene STAG2
Source: Life Sci Alliance. 2021 Aug 30;4(11):e202101083. doi: 10.26508/lsa.202101083 (PMC8408347; doi:10.26508/lsa.202101083)
Supplement: Supplementary file 5 [file LSA-2021-01083_TableS5.xlsx]

## Sheet: Sheet1
Table S5- Genetic interaction scores for the H4 screen
GENE	residual	fdr
A1BG	0.174934	0.931019
A1CF	0.22875	0.926393
A2ML1	0.213413	0.920018
A2M	-0.473813	0.783387
A3GALT2	-0.444936	0.810687
A4GALT	-0.538294	0.714372
A4GNT	-0.0265108	0.989852
AAAS	0.908704	0.369238
AACS	0.441904	0.836303
AADACL2	0.0122599	0.995999
AADACL3	-0.366093	0.853462
AADACL4	0.135364	0.95413
AADAC	0.0908042	0.970101
AADAT	-0.410158	0.825886
AAED1	-0.417953	0.816126
AAGAB	-0.261143	0.902985
AAK1	0.167445	0.934993
AAMDC	0.130811	0.954384
AAMP	0.298375	0.88904
AANAT	0.492508	0.813757
AAR2	-0.447652	0.810611
AARD	0.186812	0.926808
AARS2	0.344068	0.86292
AARSD1	0.495111	0.902985
AARS	0.276288	0.895749
AASDHPPT	0.412208	0.839864
AASDH	-0.248834	0.902985
AASS	-0.0768779	0.976595
AATF	-0.422445	0.848179
AATK	-0.212469	0.922296
ABAT	0.0841058	0.97688
ABCA10	0.52645	0.794007
ABCA12	-0.030207	0.989358
ABCA13	0.0087511	0.997187
ABCA1	0.0473214	0.987272
ABCA2	0.547149	0.716567
ABCA3	-0.33676	0.879793
ABCA4	-0.0852756	0.978539
ABCA5	-0.0996239	0.965847
ABCA6	0.122372	0.955317
ABCA7	0.331972	0.860023
ABCA8	-0.165712	0.93283
ABCA9	-0.269044	0.888833
ABCB10	0.194241	0.926393
ABCB11	-0.153742	0.94266
ABCB1	-0.0894068	0.970314
ABCB4	-0.516347	0.738387
ABCB5	-0.208674	0.919022
ABCB6	0.00502493	0.998112
ABCB7	0.280499	0.900901
ABCB8	0.0453612	0.986747
ABCB9	0.00901385	0.996832
ABCC10	0.534919	0.72966
ABCC11	-0.3298	0.86292
ABCC12	-0.187933	0.931019
ABCC1	0.830519	0.461811
ABCC2	0.254068	0.902985
ABCC3	0.410702	0.832598
ABCC4	0.186687	0.926808
ABCC5	-0.366232	0.856429
ABCC6	0.0937981	0.967595
ABCC8	-0.16416	0.939902
ABCC9	0.32395	0.86292
ABCD1	0.307981	0.892055
ABCD2	0.149461	0.94266
ABCD3	0.0566947	0.984384
ABCD4	-0.263128	0.900901
ABCE1	-0.56058	0.738387
ABCF1	0.198909	0.926393
ABCF2	-0.217202	0.923133
ABCF3	-0.203814	0.920748
ABCG1	-0.53695	0.76977
ABCG2	0.212832	0.926393
ABCG4	0.0088581	0.997261
ABCG5	-0.675643	0.608931
ABCG8	0.213497	0.921362
ABHD10	0.0355374	0.989358
ABHD11	0.0305306	0.989358
ABHD12B	-0.136611	0.948252
ABHD12	-0.240808	0.902985
ABHD13	-0.194148	0.926393
ABHD14A	-0.302662	0.884898
ABHD14B	-0.578344	0.703286
ABHD15	-0.189405	0.926393
ABHD16A	0.181674	0.926808
ABHD16B	-0.332451	0.858405
ABHD17A	0.125201	0.96031
ABHD17B	-0.318269	0.86292
ABHD17C	-0.0132299	0.994495
ABHD1	-0.193993	0.926808
ABHD2	-0.0546204	0.984384
ABHD3	-0.316956	0.865298
ABHD4	-0.155452	0.940479
ABHD5	-0.165271	0.932401
ABHD6	-0.0130589	0.994495
ABHD8	0.0480753	0.986306
ABI1	0.273833	0.890576
ABI2	0.354088	0.875665
ABI3BP	0.00625824	0.997432
ABI3	0.170329	0.931019
ABL1	0.0146388	0.99356
ABL2	-0.585636	0.690806
ABLIM1	0.082635	0.975397
ABLIM2	-0.301599	0.880299
ABLIM3	0.0150857	0.99307
ABRACL	0.309288	0.870392
ABRA	0.0866305	0.973989
ABR	-0.407247	0.82832
ABT1	0.528905	0.762894
ABTB1	-0.0935882	0.968224
ABTB2	-0.678987	0.691251
AC007040.11	0.509846	0.839279
AC007431.1	0.0336534	0.989358
AC009892.10	0.227298	0.959735
AC016722.1	-0.270952	0.892758
AC016757.3	0.0583603	0.984245
AC018755.1	0.398176	0.82626
AC079612.1	0.264883	0.895749
AC091801.1	-0.317388	0.887474
AC093802.1	-0.0152831	0.993191
AC106876.2	0.213731	0.920018
ACAA1	-0.281441	0.885468
ACAA2	0.261471	0.895749
ACACA	0.857571	0.415626
ACACB	0.336164	0.862794
ACAD10	0.344999	0.857077
ACAD11	0.431559	0.820076
ACAD8	-0.665005	0.646928
ACAD9	-0.12578	0.951889
ACADL	0.0437039	0.987932
ACADM	-0.0603429	0.984245
ACADSB	-0.651656	0.696348
ACADS	-0.107528	0.96261
ACADVL	-0.33189	0.858516
ACAN	-0.351845	0.86292
ACAP1	-0.197693	0.924205
ACAP2	0.0433838	0.988289
ACAP3	-0.51383	0.783387
ACAT1	0.402472	0.848179
ACAT2	-0.311332	0.868776
ACBD3	0.00684399	0.997432
ACBD4	-0.114093	0.962037
ACBD5	0.319151	0.868776
ACBD6	-0.0709329	0.981748
ACBD7	-0.401876	0.825193
ACCSL	0.0885313	0.970025
ACCS	-0.117724	0.957474
ACD	-0.99553	0.41997
ACE2	-0.38529	0.839279
ACER1	-0.267143	0.902985
ACER2	-0.153871	0.944856
ACER3	-0.133471	0.948926
ACE	-0.244887	0.902985
ACHE	-0.387309	0.86292
ACIN1	0.513496	0.787812
ACKR2	-0.0627023	0.981748
ACKR3	0.0399384	0.988743
ACKR4	0.198097	0.924559
ACLY	0.616273	0.710542
ACMSD	-0.119021	0.9598
ACN9	-0.336623	0.857864
ACO1	-0.0803655	0.975397
ACO2	-0.642923	0.696172
ACOT11	-0.0573035	0.984384
ACOT12	0.297824	0.902985
ACOT13	0.0326183	0.989358
ACOT2	0.422259	0.815635
ACOT4	0.499194	0.773909
ACOT6	-0.206674	0.926393
ACOT7	0.420062	0.817242
ACOT8	0.304218	0.87995
ACOT9	-0.118341	0.955727
ACOX1	0.0896191	0.97099
ACOX2	-0.318711	0.86292
ACOX3	0.17075	0.940348
ACOXL	0.101169	0.966861
ACP1	0.275663	0.885321
ACP2	-0.458368	0.794997
ACP5	-0.00977299	0.996764
ACP6	0.163084	0.937404
ACPL2	0.122557	0.954384
ACPP	0.43911	0.806197
ACPT	0.188239	0.937008
ACRBP	0.570469	0.698208
ACRC	0.526941	0.848179
ACRV1	-0.187714	0.926393
ACR	-0.0918166	0.97218
ACSBG1	-0.199021	0.926808
ACSBG2	-0.447605	0.825886
ACSF2	0.550708	0.709971
ACSF3	-0.658131	0.646928
ACSL1	0.407709	0.836556
ACSL3	0.282457	0.896689
ACSL4	-0.149257	0.94266
ACSL5	-0.0537242	0.984384
ACSL6	-0.0952589	0.965629
ACSM1	-0.426838	0.825888
ACSM2A	0.17745	0.95441
ACSM2B	-0.221848	0.914724
ACSM3	-0.163648	0.940348
ACSM4	-0.198409	0.923133
ACSM5	-0.327379	0.86292
ACSS1	-0.0738423	0.977775
ACSS2	0.379215	0.858405
ACSS3	0.0347846	0.989358
ACTA1	0.131598	0.959735
ACTA2	-0.335151	0.858643
ACTBL2	0.123741	0.959067
ACTB	0.348632	0.885321
ACTC1	0.213996	0.917419
ACTG1	0.368122	0.856429
ACTG2	0.00206031	0.999675
ACTL10	0.164683	0.942362
ACTL6A	0.130431	0.958898
ACTL6B	-0.348129	0.857077
ACTL7A	-0.0981964	0.963721
ACTL7B	0.184564	0.926808
ACTL8	-0.501886	0.815298
ACTL9	-0.0757424	0.977667
ACTN1	-0.482343	0.780782
ACTN2	0.161453	0.946977
ACTN4	0.470833	0.815298
ACTR10	0.000372576	0.999675
ACTR1A	-0.108094	0.9598
ACTR1B	-0.251125	0.902985
ACTR2	-0.432581	0.834939
ACTR3B	0.00217335	0.999675
ACTR3C	0.143144	0.967902
ACTR3	0.0996858	0.963879
ACTR5	0.888059	0.415626
ACTR6	0.389477	0.839279
ACTR8	0.0587164	0.986306
ACTRT1	-0.34129	0.857077
ACTRT2	0.733826	0.565025
ACTRT3	0.424661	0.836303
ACVR1B	0.0596789	0.984245
ACVR1C	0.373942	0.848179
ACVR1	0.067759	0.981748
ACVR2A	0.115734	0.958909
ACVR2B	0.315806	0.87188
ACVRL1	0.193163	0.926393
ACY1	-0.111747	0.959067
ACY3	-0.528328	0.736435
ACYP1	-0.0616913	0.981748
ACYP2	0.0419981	0.988342
ADAD1	0.0243283	0.990624
ADAD2	-0.376341	0.84403
ADAL	-0.238222	0.902985
ADAM10	-0.124991	0.953005
ADAM11	-0.0495108	0.985682
ADAM12	-0.2204	0.914724
ADAM15	-0.663256	0.62757
ADAM17	0.14042	0.956735
ADAM18	-0.149356	0.949117
ADAM19	0.323398	0.868069
ADAM20	-0.0703225	0.981386
ADAM21	-0.217187	0.926808
ADAM22	-0.314496	0.875665
ADAM23	0.0615201	0.983026
ADAM28	-0.168801	0.932401
ADAM29	0.222268	0.913352
ADAM2	0.141454	0.945418
ADAM30	0.388851	0.857077
ADAM32	-0.079289	0.975517
ADAM33	-0.397428	0.839864
ADAM7	0.120513	0.955727
ADAM8	0.0523147	0.984384
ADAM9	-0.340742	0.857077
ADAMDEC1	-0.0921974	0.975482
ADAMTS10	-0.346645	0.862794
ADAMTS12	-0.249082	0.924559
ADAMTS13	0.207675	0.924205
ADAMTS14	-0.28189	0.899856
ADAMTS15	-0.160248	0.938387
ADAMTS16	0.127289	0.951889
ADAMTS17	-0.336414	0.86292
ADAMTS18	0.265107	0.894862
ADAMTS19	0.382971	0.839864
ADAMTS1	-0.0961154	0.967902
ADAMTS20	-0.0174691	0.992551
ADAMTS2	-0.478069	0.805353
ADAMTS3	-0.322523	0.875318
ADAMTS4	-0.245007	0.902985
ADAMTS5	-0.140516	0.947815
ADAMTS7	0.160657	0.94266
ADAMTS8	-0.214016	0.922372
ADAMTS9	-0.585705	0.693127
ADAMTSL1	0.0193317	0.99163
ADAMTSL2	0.200837	0.923133
ADAMTSL3	0.0930005	0.96851
ADAMTSL4-AS1	-0.766066	0.532063
ADAMTSL4	0.0485205	0.986646
ADAMTSL5	-0.846823	0.453271
ADAP1	-0.141808	0.95051
ADAP2	0.0124594	0.995531
ADARB1	-0.0838669	0.973841
ADARB2	0.094325	0.966083
ADAR	-0.26824	0.893938
ADAT1	0.272664	0.885468
ADAT2	0.865323	0.608931
ADAT3	-0.21836	0.920748
ADA	0.0351065	0.989358
ADCK1	-0.166822	0.931615
ADCK2	0.581293	0.705656
ADCK3	0.0424279	0.988527
ADCK4	0.15496	0.942362
ADCK5	-0.173232	0.94266
ADCY10	-0.235108	0.908928
ADCY1	-0.119607	0.962893
ADCY2	-0.186789	0.926393
ADCY3	0.429083	0.815298
ADCY4	-0.0841128	0.973911
ADCY5	-0.270836	0.892526
ADCY6	-0.667609	0.646928
ADCY7	0.410877	0.835265
ADCY8	-0.782677	0.655485
ADCY9	0.392934	0.838981
ADCYAP1R1	-0.966582	0.413437
ADCYAP1	-0.155164	0.947815
ADC	-0.0147751	0.993447
ADD1	-0.113	0.9598
ADD2	0.0738189	0.977667
ADD3	0.0728136	0.979496
ADGB	0.0663846	0.981748
ADH1A	0.00200661	0.999675
ADH1B	0.0170494	0.992605
ADH4	-0.307758	0.885535
ADH5	-0.44147	0.811254
ADH6	-0.269708	0.902985
ADH7	-0.183369	0.932401
ADHFE1	0.031632	0.989358
ADI1	0.134837	0.95097
ADIG	-0.0380969	0.989358
ADIPOQ	-0.17048	0.931019
ADIPOR1	-0.324381	0.868776
ADIPOR2	-0.387723	0.836812
ADIRF	-0.154456	0.94266
ADK	-0.143642	0.944786
ADM2	0.337021	0.864964
ADM5	-0.577011	0.703286
ADM	-0.545346	0.734942
ADNP2	0.577567	0.713051
ADNP	-0.189837	0.937853
ADORA1	-0.147564	0.94266
ADORA2A	-0.0464063	0.986747
ADORA2B	0.193374	0.928259
ADORA3	-0.274264	0.888517
ADO	-0.320553	0.885321
ADPGK	0.0895662	0.973911
ADPRHL1	0.437405	0.825886
ADPRHL2	0.0977367	0.966213
ADPRH	-0.177877	0.931019
ADPRM	-0.225439	0.926393
ADRA1A	0.00454715	0.998354
ADRA1B	-0.0861511	0.973418
ADRA1D	0.216787	0.926393
ADRA2A	-0.242163	0.90419
ADRA2B	-0.35594	0.853246
ADRA2C	0.474659	0.803398
ADRB1	-0.403954	0.835265
ADRB2	-0.124512	0.962039
ADRB3	0.269265	0.894862
ADRBK1	0.0734492	0.977667
ADRBK2	-0.0646344	0.981748
ADRM1	0.137493	0.947815
ADSL	-0.0353472	0.989358
ADSSL1	-0.420832	0.82626
ADSS	0.455939	0.803398
ADTRP	-0.64121	0.684566
AEBP1	-0.506179	0.785326
AEBP2	-0.0285721	0.989358
AEN	-0.176334	0.931125
AES	-0.432739	0.825886
AFAP1L1	0.0555633	0.984384
AFAP1L2	0.181468	0.926808
AFAP1	-0.607849	0.680701
AFF1	-0.202159	0.924559
AFF2	0.05711	0.984384
AFF3	-0.0724866	0.977722
AFF4	-0.12141	0.955142
AFG3L2	-0.156257	0.945377
AFMID	-0.000286734	0.999776
AFM	-0.147732	0.94266
AFP	-0.424686	0.815298
AFTPH	-0.146817	0.945928
AGAP1	0.298408	0.87995
AGAP2	-0.231938	0.914724
AGAP3	0.249104	0.902985
AGA	0.183372	0.934574
AGBL1	-0.250233	0.901322
AGBL2	-0.183185	0.931019
AGBL3	0.241719	0.906197
AGBL4	0.0809994	0.975527
AGBL5	-0.250489	0.902985
AGER	-0.139522	0.955317
AGFG1	-0.183131	0.931615
AGFG2	-0.440777	0.808014
AGGF1	-0.187658	0.926393
AGK	0.475705	0.79795
AGL	-0.495079	0.773411
AGMAT	-0.340597	0.857077
AGMO	-0.091271	0.973911
AGO1	-0.373885	0.839279
AGO2	0.679188	0.64841
AGO3	-0.331116	0.868776
AGO4	0.284173	0.902985
AGPAT1	-0.633098	0.64841
AGPAT2	-0.103195	0.966083
AGPAT3	-0.203244	0.920748
AGPAT4	-0.474297	0.781577
AGPAT5	-0.0912401	0.969116
AGPAT6	0.298373	0.880299
AGPAT9	0.331885	0.87692
AGPS	-0.237155	0.908928
AGR2	0.0902723	0.976844
AGR3	-0.0395817	0.988641
AGRN	-0.178669	0.926808
AGRP	0.0868326	0.97198
AGTPBP1	-0.173109	0.931019
AGTR1	0.155994	0.94266
AGTR2	0.373032	0.84403
AGTRAP	-0.336009	0.875665
AGT	0.130306	0.951205
AGXT2	0.0741803	0.977667
AGXT	0.686889	0.674967
AHCTF1	-0.141571	0.957938
AHCYL1	-0.159818	0.93969
AHCYL2	0.335658	0.86292
AHCY	0.691586	0.608931
AHDC1	-0.0207672	0.99163
AHI1	-0.230598	0.924559
AHNAK2	0.00797503	0.997661
AHNAK	0.216682	0.914734
AHRR	0.208412	0.919022
AHR	0.0764061	0.980969
AHSA1	-0.350409	0.853462
AHSA2	-0.721297	0.644846
AHSG	-0.526791	0.796818
AHSP	0.312835	0.880299
AICDA	-0.0848686	0.977667
AIDA	-0.0332449	0.989358
AIF1L	-0.232573	0.919022
AIF1	-0.135028	0.95215
AIFM1	0.54498	0.799434
AIFM2	-0.500943	0.757002
AIFM3	-0.758174	0.508257
AIG1	-0.0770911	0.977775
AIM1L	0.762764	0.498722
AIM1	0.439607	0.803969
AIM2	-0.158102	0.954384
AIMP1	-0.267641	0.902985
AIMP2	-0.272654	0.89028
AIPL1	-0.257587	0.900042
AIP	-0.621471	0.684246
AIRE	-0.582004	0.696348
AJAP1	-0.131782	0.952745
AJUBA	-0.0530866	0.984624
AK1	-0.402907	0.854349
AK2	0.577426	0.698063
AK3	-0.167082	0.933813
AK4	-0.563702	0.710542
AK5	0.0559678	0.984384
AK7	0.188957	0.926393
AK8	0.171505	0.932401
AK9	-0.215629	0.914724
AKAP10	0.222447	0.917904
AKAP11	-0.155595	0.93969
AKAP12	-0.135902	0.95413
AKAP13	0.573057	0.713051
AKAP14	0.148734	0.94266
AKAP1	-0.275611	0.892758
AKAP2	-0.397222	0.89028
AKAP3	0.186409	0.940081
AKAP4	0.187644	0.926652
AKAP5	-0.119041	0.957715
AKAP6	-0.193549	0.937344
AKAP7	-0.566721	0.703286
AKAP8L	-0.0692231	0.984384
AKAP8	-0.145727	0.944375
AKAP9	-0.0853288	0.972334
AKIP1	0.566837	0.698063
AKIRIN1	-0.183237	0.931019
AKIRIN2	0.0221152	0.99163
AKNAD1	-0.113187	0.960151
AKNA	0.0628534	0.984384
AKR1A1	0.0426841	0.988485
AKR1B10	-0.0710027	0.979323
AKR1B15	-0.358746	0.902985
AKR1B1	-0.0423272	0.988289
AKR1C2	-0.0622217	0.989358
AKR1C3	-0.214668	0.922372
AKR1C4	0.667772	0.820996
AKR1D1	0.310009	0.870392
AKR1E2	0.285817	0.885321
AKR7A2	0.240673	0.914023
AKR7A3	0.553263	0.724145
AKT1S1	-0.0881108	0.973351
AKT1	-0.060231	0.984384
AKT2	0.12447	0.952842
AKT3	-0.113459	0.960014
AKTIP	-0.273884	0.902985
ALAD	-0.172176	0.939543
ALAS1	0.0630419	0.981748
ALAS2	-0.409987	0.820996
ALB	-0.0602	0.983026
ALCAM	-0.269082	0.892526
ALDH16A1	-0.581954	0.698063
ALDH18A1	-0.263418	0.892758
ALDH1A1	-0.216915	0.914134
ALDH1A2	0.191125	0.926393
ALDH1A3	-0.240107	0.904765
ALDH1B1	0.270162	0.892526
ALDH1L1	-0.0270474	0.990624
ALDH1L2	-0.195507	0.92919
ALDH2	0.115667	0.963721
ALDH3A1	-0.207154	0.930488
ALDH3A2	-0.02702	0.989358
ALDH3B2	0.260191	0.908928
ALDH4A1	-0.599331	0.724309
ALDH5A1	0.252528	0.902985
ALDH6A1	0.459694	0.815635
ALDH7A1	0.210853	0.931615
ALDH8A1	0.448093	0.803412
ALDH9A1	-0.0239814	0.990596
ALDOA	-0.251022	0.901041
ALDOB	0.195004	0.926808
ALDOC	-0.391292	0.853462
ALG10B	-0.918879	0.806197
ALG11	0.457164	0.789842
ALG12	0.217995	0.914734
ALG13	0.269122	0.894658
ALG14	-0.123873	0.952828
ALG1	0.369742	0.86292
ALG2	-0.275703	0.902985
ALG3	0.38764	0.839864
ALG5	0.814585	0.460335
ALG6	0.0617566	0.981748
ALG8	-0.509908	0.783387
ALG9	0.714735	0.644236
ALKBH1	-0.074066	0.977775
ALKBH2	0.371428	0.853445
ALKBH3	0.107574	0.962037
ALKBH4	-0.503932	0.738387
ALKBH5	0.350432	0.853462
ALKBH6	0.339729	0.86292
ALKBH7	-0.110349	0.958898
ALKBH8	-0.0669325	0.980969
ALK	-0.271768	0.900138
ALLC	-0.102171	0.962893
ALMS1	0.163964	0.939664
ALOX12B	-0.0795718	0.975482
ALOX12	0.204084	0.923133
ALOX15B	0.216559	0.926808
ALOX15	-0.13967	0.946662
ALOX5AP	-0.255861	0.901041
ALOX5	-0.139412	0.946662
ALOXE3	0.305085	0.877684
ALPI	0.129539	0.951971
ALPK1	0.069082	0.980832
ALPK2	-0.0883958	0.970537
ALPK3	-0.169699	0.933233
ALPL	0.171519	0.937543
ALPPL2	-0.323647	0.926393
ALPP	-0.546784	0.840539
ALS2CL	-0.309627	0.879757
ALS2CR11	0.408522	0.838738
ALS2CR12	-0.307899	0.875665
ALS2	-0.0518367	0.98544
ALX1	0.0998766	0.963721
ALX3	0.427394	0.811813
ALX4	-0.124297	0.955317
ALYREF	-0.198422	0.926808
AMACR	-0.0400131	0.988485
AMBN	0.0206118	0.99163
AMBP	0.0322665	0.989358
AMBRA1	1.09533	0.223262
AMD1	0.162749	0.94266
AMDHD1	-0.321753	0.86932
AMDHD2	-0.443388	0.806197
AMELX	0.304964	0.872194
AMELY	-0.085619	0.973911
AMER1	0.0353742	0.989358
AMER2	0.514341	0.773411
AMER3	-0.137065	0.95097
AMFR	-0.0771064	0.977228
AMHR2	-0.190626	0.926808
AMH	-0.237799	0.902985
AMICA1	-0.180424	0.931019
AMIGO1	-0.390494	0.83675
AMIGO2	-0.135115	0.95413
AMMECR1L	0.28842	0.880299
AMMECR1	-0.0800619	0.976013
AMN1	0.104055	0.963721
AMN	-0.308509	0.87526
AMOTL1	-0.247863	0.902985
AMOTL2	0.868603	0.413437
AMOT	0.0330653	0.989358
AMPD1	0.18456	0.926808
AMPD2	-0.345718	0.858643
AMPD3	-0.705617	0.64841
AMPH	-0.848789	0.41997
AMTN	0.118162	0.958675
AMT	-0.27458	0.901322
AMZ1	0.235426	0.908928
AMZ2	-0.327663	0.861101
ANAPC10	0.395043	0.83448
ANAPC11	0.579519	0.738387
ANAPC13	0.142717	0.944652
ANAPC15	0.282746	0.898043
ANAPC16	0.177151	0.930488
ANAPC1	-0.552961	0.710542
ANAPC2	-0.457026	0.815635
ANAPC4	0.23371	0.910708
ANAPC5	0.066064	0.981386
ANAPC7	0.37188	0.858405
ANGEL1	-0.0207655	0.99163
ANGEL2	0.0252185	0.99163
ANGPT1	0.319507	0.894033
ANGPT2	-0.199622	0.926393
ANGPT4	-0.19647	0.926808
ANGPTL1	0.419519	0.82626
ANGPTL2	0.262498	0.89999
ANGPTL3	0.265167	0.902985
ANGPTL4	-0.0123077	0.996764
ANGPTL5	-0.354985	0.857077
ANGPTL6	-0.16392	0.940081
ANGPTL7	0.313489	0.875665
ANG	-0.297562	0.880299
ANHX	0.35785	0.852911
ANK1	0.289321	0.883457
ANK2	0.144354	0.945928
ANK3	-0.0622096	0.984245
ANKAR	-0.410586	0.825886
ANKDD1A	0.0978473	0.970314
ANKDD1B	-0.028254	0.990624
ANKEF1	-0.0640045	0.981741
ANKFN1	0.026413	0.990624
ANKFY1	-0.18953	0.926393
ANKHD1-EIF4EBP3	-0.206887	0.924559
ANKHD1	-0.528705	0.900901
ANKH	0.505212	0.738387
ANKIB1	-0.307796	0.875665
ANKK1	0.418138	0.853462
ANKLE1	0.188679	0.926808
ANKLE2	-0.178427	0.937543
ANKMY1	0.104303	0.961484
ANKMY2	-0.302242	0.883457
ANKRA2	-0.156914	0.945377
ANKRD10	-0.108128	0.9598
ANKRD11	0.546875	0.803398
ANKRD12	0.185876	0.929093
ANKRD13A	0.0520408	0.984384
ANKRD13B	0.118977	0.955727
ANKRD13C	-0.113625	0.959067
ANKRD13D	-0.414959	0.82626
ANKRD16	0.332315	0.862729
ANKRD17	-0.583923	0.696348
ANKRD18A	-0.595282	0.881712
ANKRD18B	-0.0611943	0.989358
ANKRD1	-0.413796	0.825886
ANKRD22	0.525447	0.738387
ANKRD23	-0.58201	0.70669
ANKRD24	-0.272032	0.892526
ANKRD26	0.0327236	0.989358
ANKRD27	0.0846667	0.972488
ANKRD28	0.265635	0.900901
ANKRD29	-0.0876251	0.970025
ANKRD2	0.204092	0.926393
ANKRD30A	0.944983	0.646928
ANKRD30BL	-0.136975	0.981199
ANKRD30B	-7.12479e-08	1
ANKRD31	-0.179856	0.930552
ANKRD32	0.00227262	0.999675
ANKRD33B	0.0436009	0.988485
ANKRD33	-0.232576	0.906675
ANKRD34A	-0.396406	0.836639
ANKRD34B	0.0429209	0.988527
ANKRD34C	0.0373249	0.989358
ANKRD35	0.168809	0.940479
ANKRD36C	-0.0478799	0.984766
ANKRD36	-0.0789919	0.984384
ANKRD37	0.331428	0.86292
ANKRD39	-0.591728	0.686218
ANKRD40	-0.469489	0.778855
ANKRD42	-0.265702	0.895749
ANKRD44	-0.315204	0.875665
ANKRD45	-0.294527	0.890576
ANKRD46	0.107719	0.960151
ANKRD49	-0.163308	0.95051
ANKRD50	0.177233	0.934724
ANKRD52	0.0807362	0.981748
ANKRD53	0.0149333	0.993191
ANKRD54	0.0204053	0.99163
ANKRD55	0.392506	0.837138
ANKRD61	-0.477235	0.825886
ANKRD62	0.463783	0.78552
ANKRD63	0.0355582	0.989358
ANKRD65	-0.446721	0.838891
ANKRD66	-0.191171	0.926393
ANKRD6	0.106516	0.96251
ANKRD7	-0.018508	0.992322
ANKRD9	0.0809461	0.975316
ANKS1A	0.784078	0.529457
ANKS1B	0.366199	0.853462
ANKS3	-0.323136	0.870357
ANKS4B	-0.0292984	0.989358
ANKS6	-0.307925	0.870107
ANKUB1	0.0803868	0.977775
ANKZF1	-0.0621275	0.984384
ANLN	-0.847143	0.571207
ANO10	-0.00996854	0.99679
ANO1	0.117335	0.963721
ANO2	0.43014	0.821745
ANO3	-0.0737406	0.977667
ANO4	0.276793	0.895749
ANO5	-0.199719	0.947815
ANO6	0.194186	0.925919
ANO7	0.0303599	0.989358
ANO8	0.0697842	0.983176
ANO9	0.0447651	0.986747
ANP32A	0.621499	0.696348
ANP32B	0.393438	0.839279
ANP32D	0.769354	0.84403
ANP32E	0.105844	0.963721
ANPEP	0.271785	0.900901
ANTXR1	-0.11284	0.960613
ANTXR2	-0.194158	0.926393
ANTXRL	-0.0357779	0.989358
ANXA10	0.0459336	0.988527
ANXA11	-0.00149623	0.999675
ANXA13	0.0750874	0.977667
ANXA1	0.323862	0.86292
ANXA2R	0.664595	0.644236
ANXA2	-0.135541	0.95051
ANXA3	-0.268379	0.899328
ANXA4	-0.307166	0.875665
ANXA5	0.46339	0.783387
ANXA6	0.0462882	0.986719
ANXA7	0.320608	0.868776
ANXA9	0.502949	0.743598
AOAH	0.0308155	0.989358
AOC1	0.153666	0.940348
AOC2	-0.148042	0.946266
AOC3	0.52834	0.734942
AOX1	-0.197694	0.924559
AP001816.1	-0.519654	0.736435
AP003774.4	-0.00447175	0.998322
AP1AR	-0.122036	0.955727
AP1B1	-0.0426637	0.989358
AP1G1	0.238215	0.906086
AP1G2	0.16123	0.94266
AP1M1	-0.646498	0.64841
AP1M2	0.53434	0.714372
AP1S1	-0.504471	0.749185
AP1S2	-0.438397	0.804357
AP1S3	0.0575114	0.984384
AP2A1	-0.35913	0.853462
AP2A2	-0.216264	0.926393
AP2B1	-0.339103	0.870107
AP2M1	-0.036764	0.989358
AP2S1	-0.512359	0.734942
AP3B1	0.346053	0.857077
AP3B2	0.339202	0.858405
AP3D1	-0.0605944	0.984384
AP3M1	-0.548914	0.726467
AP3M2	0.110327	0.963721
AP3S1	0.0403757	0.988485
AP3S2	-0.137205	0.957938
AP4B1	0.181971	0.926808
AP4E1	-0.0506446	0.984384
AP4M1	0.180982	0.926808
AP4S1	-0.0500419	0.984731
AP5B1	0.286569	0.885468
AP5M1	-0.257469	0.897622
AP5S1	-0.39396	0.851598
AP5Z1	0.270428	0.89093
APAF1	0.352671	0.880299
APBA1	-0.398755	0.839864
APBA2	0.11553	0.958898
APBA3	0.383965	0.851288
APBB1IP	-0.318684	0.868776
APBB1	-0.0408252	0.988527
APBB2	0.0741528	0.977775
APBB3	-0.307164	0.875665
APC2	0.144202	0.944525
APCDD1L	-0.288063	0.887728
APCDD1	-0.0845678	0.973911
APCS	0.0886117	0.971912
APC	0.135998	0.946977
APEH	0.263108	0.898841
APEX1	-0.024902	0.991516
APEX2	-0.658961	0.64841
APH1A	0.0285755	0.989358
APH1B	-0.177353	0.928724
API5	-0.655411	0.710542
APIP	-0.237913	0.908928
APLF	-0.305167	0.883785
APLNR	-0.040716	0.988485
APLN	0.0568844	0.984245
APLP1	-0.218	0.918808
APLP2	-0.0832317	0.973418
APMAP	-0.204007	0.921362
APOA1BP	-0.0163725	0.99307
APOA1	-0.0484251	0.984731
APOA2	0.0189408	0.99163
APOA4	0.742081	0.738226
APOA5	0.107791	0.9598
APOBEC1	-0.110435	0.960151
APOBEC2	-0.45103	0.839864
APOBEC3A	-0.33181	0.864964
APOBEC3B	0.241611	0.902985
APOBEC3C	0.372052	0.857077
APOBEC3D	0.184159	0.931019
APOBEC3F	-0.32892	0.870107
APOBEC3G	-0.057993	0.984245
APOBEC3H	-0.256524	0.902985
APOBEC4	0.082044	0.977667
APOBR	0.381997	0.86292
APOB	0.0625594	0.983176
APOC1	0.191917	0.931019
APOC3	0.0835884	0.972488
APOC4	0.139259	0.948639
APOD	-0.33766	0.861101
APOE	0.226417	0.914724
APOF	0.120438	0.960151
APOH	-0.0078465	0.997187
APOL1	0.0821424	0.973725
APOL2	0.0254189	0.990456
APOL3	-0.396955	0.837138
APOL4	-0.261049	0.952745
APOL5	-0.286444	0.885321
APOL6	-0.06933	0.981029
APOLD1	-0.073962	0.980969
APOM	0.216182	0.919022
APOOL	0.15896	0.938387
APOO	0.334946	0.864964
APOPT1	-0.0109036	0.997261
APPBP2	-0.119493	0.957801
APPL1	0.0155695	0.993191
APPL2	-0.492219	0.75282
APP	0.0971932	0.963721
APRT	-0.099664	0.963721
APTX	-0.289928	0.89028
AQP10	-0.608935	0.693127
AQP11	-0.249788	0.902985
AQP1	0.49711	0.738387
AQP2	0.23187	0.914724
AQP3	0.303764	0.880299
AQP4	-0.225552	0.908928
AQP5	-0.166009	0.945418
AQP6	-0.0967182	0.966861
AQP8	0.263956	0.895749
AQP9	0.135476	0.952526
AQPEP	-0.14448	0.946662
AQR	0.135385	0.957312
ARAF	0.0343423	0.989358
ARAP1	-0.245918	0.902985
ARAP2	-0.0575802	0.984384
ARAP3	0.297405	0.876775
ARCN1	-0.273943	0.892243
ARC	-0.0743246	0.981748
AREL1	0.001504	0.999675
ARF1	0.0698476	0.981199
ARF3	-0.0581106	0.984384
ARF4	0.130545	0.95051
ARF5	0.212702	0.918588
ARF6	-0.0101791	0.996764
ARFGAP1	-0.459773	0.803398
ARFGAP2	-0.0598697	0.984384
ARFGAP3	-0.414829	0.825886
ARFGEF1	-0.301705	0.885321
ARFGEF2	-0.163725	0.936027
ARFIP1	0.159621	0.940348
ARFIP2	-0.312848	0.875621
ARFRP1	0.51182	0.738387
ARG1	-0.549886	0.778855
ARG2	-0.124441	0.952828
ARGFX	-0.559182	0.736898
ARGLU1	-0.17692	0.931019
ARHGAP10	0.0598829	0.983026
ARHGAP11A	-0.551295	0.738387
ARHGAP12	-0.266188	0.892526
ARHGAP15	-0.0518499	0.984384
ARHGAP17	0.411026	0.853462
ARHGAP18	-0.129132	0.95269
ARHGAP19	0.0695561	0.981587
ARHGAP1	0.28498	0.884686
ARHGAP20	0.591405	0.698063
ARHGAP21	0.401702	0.831545
ARHGAP22	-0.394851	0.835265
ARHGAP23	-0.0935993	0.967902
ARHGAP24	0.325855	0.86292
ARHGAP25	-0.0946117	0.966083
ARHGAP26	0.046806	0.986306
ARHGAP27	0.137534	0.946662
ARHGAP28	0.226851	0.908928
ARHGAP29	-0.0884788	0.971952
ARHGAP30	-0.71266	0.574605
ARHGAP31	0.475013	0.783387
ARHGAP32	0.123233	0.955317
ARHGAP33	0.681817	0.64841
ARHGAP35	1.30829	0.109617
ARHGAP36	0.448439	0.794007
ARHGAP39	0.336774	0.868556
ARHGAP42	-0.454112	0.83675
ARHGAP44	-0.532624	0.724145
ARHGAP4	0.293564	0.880299
ARHGAP5	-0.628225	0.662071
ARHGAP6	0.122796	0.958898
ARHGAP8	-0.0666254	0.981199
ARHGAP9	0.585746	0.684566
ARHGDIA	0.00781764	0.997247
ARHGDIB	0.0371696	0.989358
ARHGDIG	-0.0829525	0.973418
ARHGEF10L	0.00999615	0.996764
ARHGEF10	-0.31063	0.876751
ARHGEF11	0.232827	0.908928
ARHGEF12	-0.431094	0.835265
ARHGEF15	0.3794	0.84615
ARHGEF16	0.152302	0.945928
ARHGEF17	-0.159484	0.951682
ARHGEF18	-0.19645	0.926393
ARHGEF19	-0.213446	0.914734
ARHGEF1	-0.412114	0.835265
ARHGEF25	0.14803	0.944623
ARHGEF26	-0.0879694	0.97198
ARHGEF28	-0.344906	0.858405
ARHGEF2	0.266343	0.89345
ARHGEF33	-0.0880917	0.977667
ARHGEF37	0.101343	0.965847
ARHGEF38	-0.0145282	0.993699
ARHGEF39	0.173097	0.931019
ARHGEF3	0.287943	0.883933
ARHGEF40	-0.356066	0.856429
ARHGEF4	-0.142796	0.963721
ARHGEF5	0.00866642	0.996849
ARHGEF6	0.259754	0.902985
ARHGEF7	0.251733	0.904765
ARHGEF9	-0.636812	0.661404
ARID1A	0.507928	0.76158
ARID1B	0.498566	0.75246
ARID2	0.311187	0.885321
ARID3A	-0.220486	0.913395
ARID3B	-0.866895	0.562549
ARID3C	-0.0729614	0.977944
ARID4A	-0.241844	0.902985
ARID4B	0.354478	0.86932
ARID5A	-1.14903	0.164926
ARID5B	-0.208172	0.918914
ARIH1	0.442992	0.809884
ARIH2OS	0.547259	0.780706
ARIH2	0.962106	0.374564
ARL10	-0.651516	0.709971
ARL11	-0.151468	0.94266
ARL13A	0.115465	0.958361
ARL13B	-0.58841	0.696172
ARL14EP	-0.0500442	0.98544
ARL14	0.131552	0.952828
ARL15	0.375698	0.839279
ARL16	-0.119205	0.963644
ARL1	0.127174	0.951889
ARL2BP	-0.486129	0.86292
ARL2	-0.194276	0.926393
ARL3	0.185746	0.926808
ARL4A	0.0235472	0.992716
ARL4C	0.0531864	0.984384
ARL4D	0.296828	0.880299
ARL5A	0.418667	0.853621
ARL5B	0.0605732	0.983026
ARL5C	-0.344668	0.857077
ARL6IP1	0.363112	0.865534
ARL6IP4	0.259936	0.898386
ARL6IP5	0.438916	0.832628
ARL6IP6	-0.589066	0.692062
ARL6	0.449448	0.837138
ARL8A	-0.386925	0.836556
ARL8B	-0.353122	0.858643
ARL9	-0.203064	0.926808
ARMC10	0.111692	0.958898
ARMC12	-0.200383	0.922372
ARMC1	-0.0158718	0.992716
ARMC2	-0.244262	0.902985
ARMC3	0.279498	0.901041
ARMC4	-0.124	0.957801
ARMC5	0.122584	0.95636
ARMC6	-0.211854	0.923133
ARMC7	0.431673	0.839279
ARMC8	-0.428796	0.807121
ARMC9	0.0290362	0.990113
ARMCX1	-0.0123984	0.995424
ARMCX2	0.438182	0.815298
ARMCX3	-0.139743	0.947882
ARMCX4	-0.151707	0.94266
ARMCX5	-0.396283	0.839864
ARMCX6	-0.364403	0.859834
ARMS2	0.380683	0.857077
ARNT2	-0.0194877	0.99163
ARNTL2	0.218057	0.91893
ARNTL	-0.177137	0.928034
ARNT	-0.168174	0.934993
ARPC1A	-0.112845	0.957938
ARPC1B	0.0226913	0.99163
ARPC2	-0.399847	0.847011
ARPC3	0.0409526	0.988485
ARPC4	-0.0232229	0.99163
ARPC5L	-0.427239	0.811813
ARPC5	-0.254742	0.901322
ARPP19	-0.192414	0.926808
ARPP21	0.312934	0.885321
ARR3	-0.121369	0.957715
ARRB1	0.476205	0.82626
ARRB2	0.0933224	0.966861
ARRDC1	0.143599	0.948252
ARRDC2	-0.0527341	0.984384
ARRDC3	-0.282454	0.885321
ARRDC4	0.382463	0.837138
ARRDC5	-0.597488	0.737625
ARSA	0.160162	0.940377
ARSB	0.0808399	0.977228
ARSD	-1.03538	0.258533
ARSE	-0.146764	0.945377
ARSF	-0.145032	0.945377
ARSG	0.0777278	0.977228
ARSH	0.145243	0.945418
ARSI	-0.556012	0.703468
ARSJ	0.0074491	0.997432
ARSK	-0.146782	0.945377
ART1	-0.196539	0.926393
ART3	-0.165424	0.932401
ART4	0.0894108	0.970025
ART5	-0.0261624	0.990374
ARTN	0.280902	0.883785
ARV1	-0.119334	0.962355
ARVCF	-0.285924	0.880299
ARX	-0.450402	0.806197
AR	0.174849	0.94266
AS3MT	0.282971	0.893352
ASAH1	0.25391	0.901041
ASAH2	-0.0301667	0.989358
ASAP1	0.600208	0.696348
ASAP2	-0.347563	0.870392
ASAP3	0.112536	0.962648
ASB10	0.365656	0.868776
ASB11	-0.316655	0.870392
ASB12	-0.167307	0.945377
ASB13	-0.0751816	0.977667
ASB14	0.0469162	0.985682
ASB15	0.424848	0.837138
ASB16	-0.00257739	0.999492
ASB17	-0.629655	0.64841
ASB18	0.14974	0.94266
ASB1	0.0211855	0.99163
ASB2	0.247745	0.921362
ASB4	-0.627743	0.64841
ASB5	0.0274408	0.989358
ASB6	0.179204	0.932401
ASB7	0.465522	0.783387
ASB8	-0.378816	0.837138
ASB9	-0.372662	0.853462
ASCC1	-0.0315242	0.989358
ASCC2	-0.175114	0.936027
ASCC3	0.310036	0.869178
ASCL1	0.0529161	0.984384
ASCL2	-0.361646	0.850092
ASCL3	-0.265617	0.896689
ASCL4	0.332385	0.86292
ASCL5	-0.201899	0.926808
ASF1A	-0.690471	0.63609
ASF1B	0.312549	0.879793
ASGR1	-0.107464	0.960151
ASGR2	0.103888	0.962318
ASH1L	-0.029127	0.989358
ASH2L	0.404703	0.837138
ASIC1	0.286485	0.902985
ASIC2	0.153618	0.94266
ASIC3	-0.577184	0.694313
ASIC4	1.04795	0.23685
ASIC5	0.084531	0.97198
ASIP	0.261034	0.901766
ASL	-0.060903	0.983026
ASNA1	0.653756	0.649
ASNSD1	0.0452833	0.988485
ASNS	-0.134222	0.950556
ASPA	0.20629	0.926393
ASPDH	0.497518	0.805523
ASPG	0.00739841	0.997403
ASPHD1	-0.0479474	0.985682
ASPHD2	0.0829584	0.974271
ASPH	-0.171273	0.931019
ASPM	-0.464117	0.778855
ASPN	-0.202727	0.926393
ASPRV1	-0.140426	0.95097
ASPSCR1	-0.135405	0.950962
ASRGL1	-0.147622	0.956396
ASS1	0.0176861	0.992287
ASTE1	-0.0661457	0.980969
ASTL	0.0954531	0.965847
ASTN1	-0.614239	0.684566
ASTN2	-0.152534	0.945377
ASUN	-0.546213	0.736435
ASXL1	0.173792	0.93156
ASXL2	-0.635925	0.656451
ASXL3	0.512448	0.738387
ASZ1	0.291473	0.892758
ATAD1	0.193766	0.926393
ATAD2B	0.00987234	0.996764
ATAD2	0.387205	0.837138
ATAD3A	-0.457349	0.835265
ATAD3B	-0.0862049	0.972488
ATAD3C	0.0276869	0.989358
ATAD5	-0.0141426	0.993631
ATAT1	-0.228928	0.906841
ATCAY	-0.255082	0.902985
ATE1	-0.0257501	0.990596
ATF1	0.131121	0.95097
ATF2	0.100894	0.963025
ATF3	0.256754	0.901041
ATF4	0.390587	0.837138
ATF5	0.360236	0.858405
ATF6B	0.0428008	0.988485
ATF6	0.131794	0.951412
ATF7IP2	-0.0400347	0.989103
ATF7IP	0.103782	0.97873
ATF7	0.18753	0.926808
ATG10	0.0543735	0.984384
ATG12	-0.393058	0.837138
ATG13	-0.822761	0.62757
ATG14	0.141521	0.945377
ATG16L1	0.287312	0.882304
ATG16L2	-0.249107	0.901041
ATG2A	0.329526	0.858643
ATG2B	0.235845	0.904765
ATG3	0.815282	0.546122
ATG4A	0.305918	0.880299
ATG4B	-0.215283	0.914724
ATG4C	0.43566	0.817931
ATG4D	-0.0308103	0.989358
ATG5	0.432974	0.811813
ATG7	-0.00913229	0.996832
ATG9A	0.856369	0.41997
ATHL1	-0.0861057	0.97198
ATIC	-0.249077	0.902985
ATL1	0.0252254	0.990374
ATL2	0.181447	0.926808
ATL3	0.125378	0.954384
ATMIN	0.00989455	0.996764
ATM	0.259613	0.902985
ATN1	-0.106441	0.960014
ATOH1	-0.124972	0.957801
ATOH7	0.185669	0.926808
ATOH8	0.254047	0.902985
ATOX1	0.0248439	0.991182
ATP10A	-0.544789	0.710542
ATP10B	-0.567215	0.698175
ATP10D	-0.254833	0.900901
ATP11A	-0.339352	0.864964
ATP11B	-0.102594	0.97099
ATP11C	-0.217111	0.914724
ATP12A	-0.345145	0.858405
ATP13A1	-0.949619	0.293025
ATP13A2	-0.274303	0.895749
ATP13A3	0.172767	0.932401
ATP13A4	-0.53569	0.720304
ATP13A5	0.296768	0.885321
ATP1A1	0.258369	0.902985
ATP1A2	0.239092	0.914734
ATP1A3	0.0619375	0.984245
ATP1A4	-0.00384225	0.998719
ATP1B1	0.177361	0.931019
ATP1B2	0.0922221	0.972334
ATP1B3	-0.31966	0.86292
ATP1B4	-0.100686	0.962893
ATP2A1	-0.47877	0.815635
ATP2A2	-0.780215	0.595451
ATP2A3	-0.31287	0.870802
ATP2B1	-0.5103	0.773411
ATP2B2	-0.0606383	0.983281
ATP2B3	-0.00114713	0.999675
ATP2B4	-0.304711	0.876666
ATP2C1	0.264536	0.901041
ATP2C2	-0.0101468	0.996764
ATP4A	0.105731	0.960151
ATP4B	0.445076	0.807085
ATP5A1	0.259819	0.898841
ATP5B	-0.328685	0.86292
ATP5C1	-0.0615736	0.983737
ATP5D	-0.0283404	0.989358
ATP5F1	-0.397128	0.82626
ATP5G1	-0.0613312	0.984384
ATP5G2	0.24871	0.904765
ATP5G3	-0.0425336	0.988485
ATP5H	-0.0441783	0.988485
ATP5I	0.0967362	0.970314
ATP5J2	0.757909	0.848179
ATP5J	-0.0668616	0.983192
ATP5L2	1.0582	0.738387
ATP5L	-0.183053	0.93939
ATP5O	-0.155469	0.940012
ATP5SL	0.0456037	0.989165
ATP5S	0.220329	0.920748
ATP6AP1L	-0.434882	0.815298
ATP6AP1	-0.0960833	0.966861
ATP6AP2	0.00718875	0.997403
ATP6V0A1	-0.534996	0.732701
ATP6V0A2	-0.160098	0.94266
ATP6V0A4	-0.0363939	0.989358
ATP6V0B	0.199711	0.940479
ATP6V0C	-0.0889462	0.977775
ATP6V0D1	-0.060911	0.983281
ATP6V0D2	0.0362087	0.989358
ATP6V0E1	-0.504911	0.738387
ATP6V0E2	0.0140242	0.993634
ATP6V1A	-0.396331	0.86292
ATP6V1B1	-0.0203096	0.99163
ATP6V1B2	-0.0515266	0.984384
ATP6V1C1	0.418384	0.865534
ATP6V1C2	-0.375218	0.847011
ATP6V1D	0.430389	0.848336
ATP6V1E1	0.330478	0.86292
ATP6V1E2	-0.467128	0.788903
ATP6V1F	0.242177	0.908754
ATP6V1G1	-0.278102	0.902985
ATP6V1G2	-0.125813	0.951889
ATP6V1G3	-0.431065	0.815298
ATP6V1H	-0.11914	0.9598
ATP7A	-0.300674	0.880299
ATP7B	-0.515756	0.738387
ATP8A1	-0.429492	0.835265
ATP8A2	-0.362697	0.850092
ATP8B1	-0.0686517	0.981199
ATP8B2	-0.16962	0.932401
ATP8B3	0.155362	0.942362
ATP8B4	-0.0239038	0.990596
ATP9A	0.0402773	0.988485
ATP9B	0.100012	0.966277
ATPAF1	-0.246324	0.902984
ATPAF2	0.632074	0.696348
ATPIF1	-0.147144	0.946662
ATRAID	0.106078	0.960633
ATRIP	0.265385	0.894658
ATRNL1	0.113825	0.958107
ATRN	-0.788593	0.562549
ATRX	-0.261192	0.899314
ATR	0.981346	0.335544
ATXN10	-0.174572	0.932401
ATXN1L	-0.275912	0.892526
ATXN1	0.0956512	0.96667
ATXN2L	0.664018	0.64841
ATXN2	-0.0765527	0.977021
ATXN3L	0.189166	0.926393
ATXN3	0.188023	0.931395
ATXN7L1	0.101488	0.963721
ATXN7L2	0.323421	0.86292
ATXN7L3B	0.1479	0.951889
ATXN7L3	0.125664	0.952842
ATXN7	-0.592473	0.680701
AUH	-0.0332736	0.989358
AUNIP	-0.174435	0.930674
AUP1	-0.0287851	0.989655
AURKAIP1	-0.269276	0.89093
AURKA	-0.423315	0.815112
AURKB	-0.240477	0.926393
AURKC	0.429896	0.831637
AUTS2	0.476186	0.785326
AVEN	0.0867447	0.97198
AVIL	-0.505527	0.755502
AVL9	-0.125949	0.963204
AVPI1	-0.0285358	0.989358
AVPR1A	0.148949	0.94266
AVPR1B	0.0971343	0.965629
AVPR2	-0.393871	0.845741
AVP	-0.0127121	0.995268
AWAT1	0.49034	0.776867
AWAT2	0.22371	0.914724
AXDND1	-0.171421	0.931347
AXIN1	0.257747	0.898841
AXIN2	-0.0115679	0.995999
AXL	0.051275	0.984384
AZGP1	0.13775	0.95097
AZI1	0.421552	0.86292
AZI2	-0.48866	0.773411
AZIN1	-0.157084	0.944652
AZU1	0.0630631	0.981748
B2M	-0.320375	0.876666
B3GALNT1	-0.123204	0.952828
B3GALNT2	-0.231923	0.907117
B3GALT1	0.10711	0.962171
B3GALT2	0.0594665	0.983176
B3GALT4	0.135606	0.951818
B3GALT5	0.275728	0.893156
B3GALT6	-0.315545	0.914724
B3GALTL	-0.296395	0.880299
B3GAT1	-0.490187	0.778855
B3GAT2	0.297238	0.893156
B3GAT3	0.195401	0.926393
B3GNT1	-0.0762742	0.97873
B3GNT2	-0.564288	0.709971
B3GNT3	-0.702704	0.64841
B3GNT4	-0.667959	0.703286
B3GNT5	-0.671438	0.64841
B3GNT6	0.106299	0.961974
B3GNT7	0.082749	0.975397
B3GNT8	-0.389034	0.853462
B3GNT9	-0.262056	0.901766
B3GNTL1	0.18721	0.934574
B4GALNT1	0.379596	0.839719
B4GALNT2	-0.14029	0.953005
B4GALNT3	0.0189937	0.991665
B4GALNT4	-0.714366	0.562549
B4GALT1	0.149319	0.94266
B4GALT2	-0.456838	0.839279
B4GALT3	-0.599683	0.685765
B4GALT4	-0.407847	0.820076
B4GALT5	-0.369221	0.853621
B4GALT6	0.0995206	0.963721
B4GALT7	-0.19087	0.93939
B9D1	-0.166143	0.932401
B9D2	-0.207325	0.919409
BAALC	-0.0244548	0.990624
BAAT	-0.205044	0.924559
BABAM1	0.315387	0.868776
BACE1	0.00106337	0.999675
BACE2	-0.104499	0.962039
BACH1	-0.714352	0.567948
BACH2	0.00184818	0.999675
BAD	0.486036	0.821745
BAG1	0.18218	0.932342
BAG2	0.0984252	0.963721
BAG3	-0.0660109	0.984384
BAG4	-0.0880887	0.970537
BAG5	-0.375863	0.837582
BAG6	-0.607541	0.662071
BAHD1	0.0022148	0.999675
BAI1	0.39125	0.86292
BAI2	-0.0220281	0.99163
BAI3	-0.553006	0.736435
BAIAP2L1	0.120745	0.957715
BAIAP2L2	0.27158	0.898264
BAIAP2	-0.591979	0.759676
BAIAP3	-0.226346	0.914724
BAK1	-0.231442	0.912483
BAMBI	0.184696	0.926808
BANF1	-0.369667	0.875524
BANF2	-0.107928	0.9598
BANK1	-0.16552	0.932401
BANP	-0.438105	0.853445
BAP1	-0.474815	0.773411
BARD1	0.0493499	0.986747
BARHL1	-0.0348072	0.989358
BARHL2	0.0115944	0.995531
BARX1	0.208087	0.924559
BARX2	-0.485482	0.798286
BASP1	-0.163245	0.934724
BATF2	-0.0823136	0.973841
BATF3	-0.125549	0.955317
BATF	-0.000130877	0.999944
BAX	0.378429	0.839279
BAZ1A	0.11716	0.957715
BAZ1B	0.326506	0.870392
BAZ2A	-0.465512	0.794007
BAZ2B	-0.073029	0.980969
BBC3	0.207857	0.91943
BBIP1	0.160512	0.936027
BBOX1	-0.728081	0.608931
BBS10	0.266123	0.898043
BBS12	-0.246975	0.902985
BBS1	0.019798	0.99163
BBS2	0.0747638	0.977667
BBS4	0.0491383	0.984766
BBS5	0.133965	0.948862
BBS7	-0.313758	0.86932
BBS9	0.029411	0.989358
BBX	-0.541289	0.738387
BCAM	-0.189909	0.926808
BCAN	-0.401544	0.82626
BCAP29	-0.11644	0.957189
BCAP31	1.00828	0.23685
BCAR1	-0.10647	0.963721
BCAR3	-0.0517078	0.984384
BCAS1	0.234179	0.906457
BCAS2	-0.318177	0.86932
BCAS3	-0.22815	0.926393
BCAS4	0.032433	0.989358
BCAT1	0.167565	0.931615
BCAT2	0.118388	0.956396
BCCIP	0.327312	0.86292
BCDIN3D	-0.0640197	0.984384
BCHE	-0.126642	0.955317
BCKDHA	-0.700043	0.575735
BCKDHB	-0.241497	0.904355
BCKDK	-0.434864	0.810611
BCL10	0.285038	0.885321
BCL11A	-0.143701	0.944652
BCL11B	-0.231744	0.905796
BCL2A1	-0.623109	0.71929
BCL2L10	-0.090071	0.977775
BCL2L11	-0.206411	0.920748
BCL2L12	-0.475953	0.783387
BCL2L13	-0.0218567	0.993191
BCL2L14	-0.310838	0.885321
BCL2L15	-0.0983954	0.963879
BCL2L1	0.458024	0.798286
BCL2L2	0.421098	0.850092
BCL2	-0.146565	0.945264
BCL3	0.234539	0.905008
BCL6B	-0.193435	0.926808
BCL6	-0.302748	0.880299
BCL7A	-0.0217907	0.99163
BCL7B	0.470435	0.773411
BCL7C	-0.376643	0.851288
BCL9L	-0.387944	0.837138
BCL9	0.597352	0.736435
BCLAF1	0.306468	0.87995
BCMO1	0.317233	0.895749
BCO2	-0.0873726	0.970314
BCORL1	-0.332029	0.864964
BCOR	0.326891	0.861287
BCR	-0.101049	0.963721
BCS1L	-0.0381304	0.988847
BDH1	0.112764	0.958445
BDH2	0.0237046	0.990624
BDKRB1	0.530362	0.717087
BDKRB2	0.448885	0.815112
BDNF	-0.148934	0.94635
BDP1	-0.784334	0.759171
BEAN1	0.240465	0.902985
BECN1	0.587771	0.696348
BEGAIN	0.0222786	0.99163
BEND2	0.512646	0.741722
BEND3	-0.290618	0.884686
BEND4	-0.72636	0.585543
BEND5	0.176555	0.931019
BEND6	-0.0031374	0.999445
BEND7	0.0633079	0.981748
BEST1	-0.155736	0.942023
BEST2	-0.562314	0.738387
BEST3	0.121558	0.957715
BEST4	-0.0998747	0.965559
BET1L	-0.53068	0.758732
BET1	0.0706671	0.984384
BEX1	0.268887	0.89999
BEX2	-0.124839	0.972692
BEX4	-0.115062	0.957801
BEX5	-0.00129354	0.999675
BFAR	-0.0323574	0.989358
BFSP1	0.183958	0.926808
BFSP2	-0.0135227	0.994894
BGLAP	-0.323865	0.86292
BGN	0.282175	0.881712
BHLHA15	-0.571777	0.703286
BHLHA9	-0.212313	0.926393
BHLHB9	0.0580191	0.98346
BHLHE22	-0.0390297	0.989358
BHLHE23	-0.232453	0.907413
BHLHE40	0.225764	0.908928
BHLHE41	-0.864529	0.415626
BHMT2	-0.183666	0.930359
BHMT	0.0881066	0.97099
BICC1	0.120211	0.957601
BICD1	-0.294146	0.879793
BICD2	-0.590318	0.740641
BID	-0.169072	0.938387
BIK	-0.179605	0.926808
BIN1	-0.601439	0.686014
BIN2	-0.422477	0.850092
BIN3	-0.304589	0.879065
BIRC2	1.27803	0.053733
BIRC3	0.4275	0.818127
BIRC5	0.876462	0.413437
BIRC6	-0.234175	0.90492
BIRC7	-0.161996	0.94266
BIRC8	0.241522	0.902985
BIVM	-0.187071	0.930373
BLACE	-0.130352	0.950422
BLCAP	-0.00520802	0.99799
BLID	-0.116422	0.95723
BLK	-0.534658	0.776867
BLMH	0.276479	0.892758
BLM	-0.216506	0.914734
BLNK	-0.452246	0.817931
BLOC1S1	-0.472865	0.797427
BLOC1S2	0.595386	0.696172
BLOC1S3	-0.385655	0.840296
BLOC1S4	-0.493285	0.757372
BLOC1S5	0.0200975	0.99163
BLOC1S6	-0.0289351	0.989358
BLVRA	-0.0252636	0.991019
BLVRB	-0.196911	0.926393
BLZF1	0.277769	0.896689
BMF	0.0307931	0.989358
BMI1	0.12409	0.957312
BMP10	0.33661	0.86292
BMP15	0.144076	0.94635
BMP1	-0.127013	0.952745
BMP2K	-0.0838442	0.976595
BMP2	-0.242214	0.902985
BMP3	0.454903	0.806197
BMP4	-0.201502	0.926393
BMP5	0.13202	0.951889
BMP6	0.117422	0.955317
BMP7	0.512207	0.78552
BMP8A	0.170704	0.95413
BMP8B	-0.0268965	0.994798
BMPER	-0.375731	0.853445
BMPR1A	-0.30465	0.885321
BMPR1B	-0.203997	0.931019
BMPR2	-0.248827	0.918808
BMS1	0.600133	0.709971
BMX	0.182033	0.97099
BNC1	-0.214316	0.918808
BNC2	0.206592	0.921949
BNIP1	0.219694	0.926393
BNIP2	-0.125213	0.955317
BNIP3L	-0.261702	0.89999
BNIP3	-0.900981	0.374564
BNIPL	0.100185	0.972488
BOC	-0.712228	0.649
BOD1L1	0.380143	0.852911
BOD1L2	0.278294	0.894862
BOD1	-0.104747	0.984384
BOK	0.0494858	0.988072
BOLA1	-0.227276	0.919022
BOLA3	-0.108203	0.969236
BOLL	-0.472924	0.787942
BOP1	-0.758002	0.562549
BORA	-0.724908	0.649
BPGM	-0.0608568	0.981748
BPHL	-0.0641528	0.983026
BPIFA1	0.400591	0.832745
BPIFA2	-0.119402	0.957801
BPIFA3	0.00647594	0.997403
BPIFB1	-0.350101	0.857077
BPIFB2	-0.247313	0.904765
BPIFB3	-0.235993	0.913395
BPIFB4	-0.238989	0.919022
BPIFB6	-0.14414	0.945418
BPIFC	0.218681	0.914724
BPI	0.28746	0.880299
BPNT1	-0.506025	0.794129
BPTF	-0.150951	0.94266
BRAF	0.146884	0.95097
BRAP	-0.179639	0.931615
BRAT1	-0.263622	0.903662
BRCA1	-0.534088	0.738387
BRCA2	0.0456672	0.989358
BRCC3	-0.01872	0.991633
BRD1	0.0665206	0.981199
BRD2	-0.586556	0.714372
BRD3	0.118836	0.958361
BRD4	-0.0171414	0.992605
BRD7	0.118869	0.957801
BRD8	0.425937	0.825886
BRD9	0.291826	0.885321
BRDT	-0.431798	0.806197
BRE	-0.400767	0.836303
BRF1	0.0748637	0.984337
BRF2	0.285103	0.888517
BRI3BP	-0.384883	0.839719
BRI3	0.125881	0.95413
BRICD5	-0.199563	0.926808
BRINP1	-0.0935665	0.975397
BRINP2	-0.423025	0.818006
BRINP3	-0.077446	0.977667
BRIP1	0.44335	0.820955
BRIX1	0.0748579	0.977667
BRK1	-0.540949	0.786277
BRMS1L	-0.371962	0.868069
BRMS1	0.18906	0.939902
BROX	-0.355535	0.858405
BRPF1	0.63613	0.691251
BRPF3	-0.0850895	0.973418
BRS3	-0.0630884	0.982762
BRSK1	-0.148106	0.944652
BRSK2	-0.50246	0.757002
BRWD1	0.710982	0.562549
BRWD3	0.079312	0.978195
BSCL2	-0.217242	0.917904
BSDC1	-0.231784	0.908928
BSG	0.103649	0.963025
BSND	-0.118452	0.955317
BSN	-0.233068	0.904765
BSPH1	0.113621	0.958675
BSPRY	-0.20711	0.926393
BST1	0.154999	0.94266
BST2	0.00705518	0.997403
BSX	-0.19498	0.926808
BTAF1	-0.0532636	0.984384
BTBD10	0.0379611	0.989358
BTBD11	-0.233998	0.902985
BTBD16	0.17289	0.931019
BTBD17	-0.171972	0.930552
BTBD18	0.0308005	0.989358
BTBD19	0.0606864	0.982762
BTBD1	0.0490773	0.984384
BTBD2	-0.276176	0.89028
BTBD3	-0.331933	0.880299
BTBD6	0.0366551	0.989358
BTBD7	-0.21561	0.918735
BTBD8	0.243725	0.913185
BTBD9	0.891964	0.41997
BTC	0.173644	0.931019
BTD	0.0816757	0.975397
BTF3L4	0.249395	0.905008
BTF3	0.387693	0.897206
BTG1	0.455604	0.796219
BTG2	-0.359706	0.848606
BTG3	-0.08834	0.977667
BTG4	-0.364432	0.853621
BTK	-0.433633	0.807085
BTLA	0.10903	0.963025
BTN1A1	-0.308476	0.880299
BTN2A1	-0.504001	0.75282
BTN2A2	0.233547	0.908961
BTN3A1	0.00203388	0.999675
BTN3A2	0.0922485	0.981748
BTN3A3	-0.279109	0.885468
BTNL3	0.00862576	0.996999
BTNL8	-0.120441	0.955317
BTNL9	-0.208514	0.918113
BTRC	-0.378944	0.839279
BUB1B	0.383422	0.844212
BUB1	-0.120286	0.962039
BUB3	0.36751	0.848179
BUD13	0.8346	0.696348
BUD31	-0.289389	0.895749
BVES	-0.210767	0.916109
BYSL	-0.217659	0.921277
BZRAP1	0.92071	0.562549
BZW1	0.135623	0.947815
BZW2	-0.0572744	0.984384
C10orf105	-0.135257	0.951237
C10orf107	0.0999985	0.963721
C10orf10	-0.408209	0.825888
C10orf111	0.00361321	0.998918
C10orf113	0.298364	0.880299
C10orf115	0.213651	0.914724
C10orf118	0.391373	0.835265
C10orf11	0.418419	0.825886
C10orf120	0.516258	0.738387
C10orf126	0.23026	0.905796
C10orf128	-0.228196	0.907117
C10orf129	0.326113	0.86292
C10orf12	-0.40887	0.835265
C10orf131	0.085087	0.971554
C10orf137	0.321285	0.870392
C10orf25	-0.345494	0.885468
C10orf2	-0.317065	0.880299
C10orf32	-0.235889	0.90492
C10orf35	-0.167041	0.936908
C10orf40	0.0993753	0.966439
C10orf53	-0.169353	0.932401
C10orf54	0.0313047	0.989358
C10orf55	0.253348	0.908198
C10orf62	-0.620862	0.655485
C10orf67	0.0553897	0.984384
C10orf68	-0.18884	0.926393
C10orf71	-0.345403	0.857077
C10orf76	0.0425267	0.988289
C10orf82	0.371396	0.853462
C10orf85	0.251628	0.901322
C10orf88	0.0639185	0.984066
C10orf90	-0.356072	0.853621
C10orf91	-0.0855108	0.977021
C10orf95	-0.0931191	0.967277
C10orf99	0.822291	0.460335
C11orf16	-0.141899	0.946266
C11orf1	0.0880557	0.971704
C11orf21	-0.599532	0.703286
C11orf24	-0.0114433	0.997661
C11orf30	0.549205	0.807274
C11orf31	-0.512906	0.762894
C11orf35	-0.0307638	0.989358
C11orf40	0.448484	0.815298
C11orf42	-0.21393	0.914724
C11orf44	-0.0561889	0.984384
C11orf45	-0.00495409	0.99823
C11orf48	0.0934899	0.970314
C11orf49	-0.0973867	0.963721
C11orf52	0.136301	0.948862
C11orf53	0.209244	0.923148
C11orf54	-0.0697144	0.980267
C11orf57	-0.221898	0.921362
C11orf58	-0.0492324	0.984947
C11orf63	0.592242	0.709971
C11orf65	-0.18572	0.926808
C11orf68	-0.665196	0.664936
C11orf70	0.253141	0.901322
C11orf71	-0.379129	0.856429
C11orf72	-0.345048	0.883645
C11orf73	-0.408706	0.829795
C11orf74	-0.198567	0.948862
C11orf80	0.00692399	0.997403
C11orf82	-0.0397027	0.988527
C11orf83	0.566468	0.71929
C11orf84	0.025048	0.991182
C11orf85	0.204556	0.924947
C11orf86	0.331843	0.858643
C11orf87	-0.146523	0.943031
C11orf88	-0.20756	0.924084
C11orf89	-0.224817	0.926393
C11orf91	-0.22479	0.909411
C11orf94	-0.0735737	0.98093
C11orf96	-0.32809	0.86292
C12orf10	-0.239194	0.902985
C12orf23	0.2232	0.912483
C12orf29	0.296667	0.887474
C12orf36	0.723151	0.608931
C12orf39	0.141923	0.948913
C12orf40	-0.314296	0.86932
C12orf42	0.447073	0.79795
C12orf43	-0.115864	0.975397
C12orf44	0.332689	0.894798
C12orf45	0.382378	0.856429
C12orf49	-0.250574	0.902985
C12orf4	-0.353282	0.857077
C12orf50	-0.145607	0.943237
C12orf52	-0.492275	0.773411
C12orf54	0.169466	0.933813
C12orf55	-0.736731	0.61547
C12orf56	-0.57315	0.703286
C12orf57	-0.0669812	0.980832
C12orf5	0.076566	0.977667
C12orf60	-0.099547	0.970025
C12orf61	-0.174179	0.936027
C12orf65	0.147628	0.95051
C12orf66	-0.0121489	0.995133
C12orf68	-0.333491	0.870392
C12orf71	-0.0248967	0.990624
C12orf73	-0.208021	0.920748
C12orf74	0.253418	0.902985
C12orf75	0.480437	0.803398
C12orf76	0.176397	0.931019
C12orf77	-0.246073	0.922017
C13orf35	-0.203945	0.926808
C14orf105	-0.352356	0.857077
C14orf119	0.322074	0.86292
C14orf132	-0.00318118	0.999106
C14orf142	-0.653708	0.709971
C14orf159	-0.0379711	0.988859
C14orf164	-0.369769	0.853462
C14orf166B	0.0711265	0.979238
C14orf166	0.782521	0.501084
C14orf177	-0.114246	0.957801
C14orf178	0.183768	0.926808
C14orf180	0.115349	0.957715
C14orf182	-0.280002	0.896689
C14orf183	0.115077	0.957312
C14orf1	0.322447	0.868901
C14orf23	-0.107265	0.962648
C14orf28	-0.161819	0.944176
C14orf2	-0.114327	0.975896
C14orf37	-0.515054	0.758125
C14orf39	0.226731	0.922372
C14orf79	-0.395144	0.86292
C14orf80	-0.206351	0.924559
C14orf93	-0.452191	0.811813
C15orf26	-0.506525	0.753367
C15orf27	-0.418151	0.835265
C15orf32	-0.244675	0.921949
C15orf37	-0.12424	0.955317
C15orf38	0.531879	0.857077
C15orf39	-0.299711	0.880299
C15orf40	-0.565285	0.724145
C15orf41	0.101859	0.97099
C15orf43	-0.0263653	0.989358
C15orf48	-0.17703	0.930359
C15orf52	-0.240753	0.924205
C15orf53	0.253971	0.904765
C15orf54	-0.647224	0.654903
C15orf56	0.648878	0.646928
C15orf57	-0.196675	0.926393
C15orf59	-0.136084	0.95097
C15orf60	0.170106	0.931019
C15orf61	-0.488027	0.783387
C15orf62	0.161129	0.939827
C16orf11	0.223035	0.914724
C16orf13	0.0293567	0.989358
C16orf3	-0.157685	0.94266
C16orf45	-0.100437	0.963721
C16orf46	-0.321536	0.86292
C16orf47	-0.358326	0.853462
C16orf52	0.335504	0.86292
C16orf54	0.108773	0.9598
C16orf58	-0.788301	0.554592
C16orf59	-0.113394	0.958898
C16orf62	0.46044	0.800536
C16orf70	0.308251	0.896312
C16orf71	-0.0375394	0.989358
C16orf72	0.300857	0.902985
C16orf74	0.0423106	0.988485
C16orf78	-0.124479	0.955727
C16orf80	0.230293	0.914724
C16orf86	-0.0970429	0.964137
C16orf87	0.151011	0.944375
C16orf89	-0.337641	0.859834
C16orf90	-0.0252583	0.99163
C16orf91	-0.298557	0.882062
C16orf92	-0.190142	0.926808
C16orf93	0.257714	0.904765
C16orf95	0.496718	0.767649
C16orf96	0.308185	0.876666
C16orf97	-0.415079	0.820955
C16orf98	-0.21341	0.943645
C17orf100	0.347805	0.857077
C17orf102	-0.138021	0.947988
C17orf104	-0.312359	0.880299
C17orf105	-0.267989	0.901746
C17orf107	-0.275552	0.885468
C17orf112	0.0358049	0.989358
C17orf47	0.0678142	0.981199
C17orf49	-0.286569	0.947815
C17orf50	-0.211482	0.922017
C17orf51	-0.311839	0.874706
C17orf53	-0.845563	0.415626
C17orf58	0.324348	0.868901
C17orf59	0.221906	0.919022
C17orf62	-0.0442887	0.988485
C17orf64	0.180275	0.926808
C17orf66	0.325758	0.870107
C17orf67	-0.629808	0.703286
C17orf70	-0.410105	0.822347
C17orf72	-0.109491	0.960151
C17orf74	0.13135	0.954384
C17orf75	-0.0184379	0.992605
C17orf77	-0.391835	0.836303
C17orf78	0.098513	0.967902
C17orf80	-0.140712	0.94635
C17orf82	0.0424387	0.988356
C17orf85	0.182293	0.930359
C17orf89	-0.537078	0.714372
C17orf96	-0.155216	0.94635
C17orf97	-0.823006	0.460335
C17orf98	0.0235778	0.99163
C17orf99	-0.186392	0.930359
C18orf21	-0.547468	0.724145
C18orf25	-0.000876648	0.999675
C18orf42	-0.203844	0.924205
C18orf54	-0.0106944	0.996764
C18orf63	-0.359654	0.857077
C18orf8	0.0894445	0.970025
C19orf10	0.542381	0.736435
C19orf12	0.069434	0.980599
C19orf18	0.289651	0.885321
C19orf24	0.0172414	0.992605
C19orf25	0.327019	0.86292
C19orf26	-0.236263	0.902985
C19orf33	0.0307376	0.989358
C19orf35	-0.499806	0.738387
C19orf38	0.194093	0.926393
C19orf40	0.238275	0.909299
C19orf43	0.599732	0.684566
C19orf44	-0.273425	0.902985
C19orf45	-0.351274	0.86292
C19orf47	-0.193742	0.926393
C19orf48	0.0565054	0.984384
C19orf52	0.319094	0.875665
C19orf53	-0.527372	0.719586
C19orf54	0.329597	0.86292
C19orf55	0.0600181	0.983026
C19orf57	-0.546762	0.738387
C19orf59	0.0278574	0.990596
C19orf60	-0.198953	0.926808
C19orf66	-0.267861	0.892526
C19orf67	-0.301758	0.879065
C19orf68	-0.35471	0.853462
C19orf70	-0.377413	0.868069
C19orf71	-0.0201871	0.99163
C19orf73	0.151589	0.94266
C19orf77	-0.0638172	0.982408
C19orf80	0.152021	0.944856
C19orf81	0.17876	0.926808
C1D	0.253275	0.933549
C1GALT1C1	-0.120515	0.955613
C1GALT1	0.268714	0.89852
C1QA	-0.413088	0.853621
C1QBP	-0.100365	0.963721
C1QB	-0.0451833	0.988072
C1QC	-0.102723	0.963721
C1QL1	-0.384193	0.837138
C1QL2	0.562344	0.738387
C1QL3	0.14093	0.946662
C1QL4	0.0830099	0.979238
C1QTNF1	-0.0556452	0.984384
C1QTNF2	-0.22308	0.91893
C1QTNF3	-0.357268	0.853462
C1QTNF4	-0.294932	0.886831
C1QTNF5	-0.0940628	0.973911
C1QTNF6	0.0689435	0.983017
C1QTNF7	0.135112	0.949614
C1QTNF8	0.234453	0.914724
C1RL	0.286448	0.880299
C1S	0.41007	0.818127
C1orf100	-0.443381	0.816126
C1orf101	-0.175022	0.931019
C1orf105	-0.256662	0.896689
C1orf106	-0.395614	0.837138
C1orf109	0.0415589	0.989358
C1orf110	-0.174793	0.930793
C1orf111	-0.573685	0.803398
C1orf112	0.398926	0.839279
C1orf115	-0.556014	0.703286
C1orf116	-0.0539932	0.985682
C1orf122	0.29807	0.880299
C1orf123	0.0475823	0.988485
C1orf131	0.436944	0.816836
C1orf137	0.106365	0.960151
C1orf141	0.0285157	0.991516
C1orf145	0.0211069	0.996764
C1orf146	0.312501	0.914724
C1orf147	-0.428346	0.836303
C1orf158	0.0727078	0.977775
C1orf159	-0.294838	0.883785
C1orf162	0.140224	0.948252
C1orf168	0.49093	0.778855
C1orf170	-0.00810666	0.997161
C1orf172	0.246855	0.904355
C1orf173	-0.126814	0.955317
C1orf174	0.797218	0.465647
C1orf177	0.351935	0.86292
C1orf180	0.110047	0.958898
C1orf185	0.0213724	0.99163
C1orf186	-0.433619	0.825886
C1orf189	-0.134887	0.950688
C1orf192	0.196779	0.926393
C1orf194	-0.0773078	0.977021
C1orf195	-0.338271	0.857077
C1orf198	-0.0222961	0.99163
C1orf200	-0.262444	0.898043
C1orf204	-0.309514	0.876666
C1orf210	0.105758	0.962276
C1orf213	-0.416937	0.820076
C1orf216	-0.526122	0.813326
C1orf21	0.367635	0.849656
C1orf220	0.0838792	0.972488
C1orf226	0.0743323	0.977667
C1orf227	-0.0957831	0.967382
C1orf228	0.359632	0.853462
C1orf229	0.0394709	0.988527
C1orf233	-0.255851	0.91893
C1orf27	0.120561	0.960633
C1orf35	-0.100489	0.963721
C1orf43	0.427477	0.870392
C1orf50	0.157396	0.940081
C1orf51	-0.469704	0.815298
C1orf52	0.2904	0.880299
C1orf53	-0.0673585	0.981386
C1orf54	-0.156645	0.946662
C1orf56	0.213137	0.914734
C1orf61	0.0947039	0.969544
C1orf63	-0.045767	0.986747
C1orf64	-0.0400131	0.988743
C1orf65	0.0227322	0.991516
C1orf68	-0.261478	0.895749
C1orf74	0.398581	0.82626
C1orf85	-0.273513	0.902985
C1orf86	0.477159	0.775408
C1orf87	0.0566338	0.984384
C1orf94	-0.215685	0.914724
C1orf95	-0.472053	0.806197
C20orf112	0.169421	0.937543
C20orf141	-0.06047	0.981748
C20orf144	0.497247	0.835265
C20orf166	0.458494	0.815298
C20orf173	-0.16076	0.944652
C20orf187	0.434303	0.879065
C20orf194	-0.247482	0.902985
C20orf195	0.0234871	0.990807
C20orf196	-0.105797	0.963721
C20orf197	-0.57774	0.703286
C20orf201	0.187134	0.926393
C20orf202	0.358647	0.854159
C20orf24	-0.0614972	0.981748
C20orf26	-0.484855	0.783387
C20orf27	0.0493977	0.98544
C20orf62	0.0283692	0.990807
C20orf78	0.143609	0.944652
C20orf85	-0.298505	0.87995
C20orf96	0.192901	0.931019
C21orf119	-0.029836	0.989358
C21orf128	-0.00144602	0.999675
C21orf2	0.66426	0.613056
C21orf33	-0.402486	0.857077
C21orf37	-0.69441	0.860023
C21orf49	-0.0032242	0.999037
C21orf54	-0.165894	0.934993
C21orf58	-0.0792818	0.975482
C21orf59	0.29264	0.885468
C21orf62	0.179655	0.926808
C21orf67	-0.895036	0.374564
C21orf88	-0.478842	0.785326
C21orf90	-0.270582	0.89382
C21orf91	-0.0213676	0.99163
C22orf15	-0.15614	0.94266
C22orf23	0.285922	0.880299
C22orf24	0.102741	0.965823
C22orf26	0.0968024	0.966083
C22orf29	0.180215	0.932401
C22orf31	0.463487	0.788903
[truncated: 16,048 more rows]
